1 **Plant genetic effects on microbial hubs impact fitness across field**  
2 **trials**

3  
4

5 Benjamin Brachi<sup>1,2</sup>, Daniele Filaault<sup>3\*</sup>, Hannah Whitehurst<sup>1\*</sup>, Paul Darne<sup>1</sup>, Pierre Le Gars<sup>1</sup>,  
6 Marine Le Mentec<sup>1</sup>, Timothy C. Morton<sup>1</sup>, Envel Kerdaffrec<sup>3</sup>, Fernando Rabanal<sup>3</sup>, Alison  
7 Anastasio<sup>1</sup>, Mathew S. Box<sup>4</sup>, Susan Duncan<sup>4</sup>, Feng Huang<sup>1,5</sup>, Riley Leff<sup>1</sup>, Polina Novikova<sup>3</sup>,  
8 Matthew Perisin<sup>1</sup>, Takashi Tsuchimatsu<sup>3</sup>, Roderick Woolley<sup>1</sup>, Caroline Dean<sup>4</sup>, Magnus  
9 Nordborg<sup>3</sup>, Svante Holm<sup>6</sup>, Joy Bergelson<sup>1</sup>

10

11 **Affiliations:**

12 <sup>1</sup>Department of Ecology and Evolution, University of Chicago, Chicago, IL 60637

13 <sup>2</sup>Univ. Bordeaux, INRAE, BIOGECO, F-33610 Cestas, France

14 <sup>3</sup>Gregor Mendel Institute (GMI), Austrian Academy of Sciences, Vienna Biocenter (VBC),  
15 Dr. Bohr-Gasse 3, 1030 Vienna, Austria

16 <sup>4</sup>John Innes Center, Norwich, UK

17 <sup>5</sup>South China Botanical Garden, Chinese Academy of Sciences, Guangzhou, China

18 <sup>6</sup>Mid-Sweden University, Sundsvall, Sweden

19 \*contributed equally to the work

20 **Abstract:**

21 Although complex interactions between hosts and microbial associates are increasingly well  
22 documented, we still know little about how and why hosts shape microbial communities in  
23 nature. In addition, host genetic effects on microbial communities vary widely depending on  
24 the environment, obscuring conclusions about which microbes are impacted and which plant  
25 functions are important. We characterized the leaf microbiota of 200 *A. thaliana* genotypes in  
26 eight field experiments and detected consistent host effects on specific, broadly distributed  
27 microbial OTU's. Host genetics disproportionately influenced hubs within the microbial  
28 communities, with their impact then percolating through the community, as evidenced by a  
29 decline in the heritability of particular OTUs with their distance to the nearest hub. By  
30 simultaneously measuring host performance, we found that host genetics associated with  
31 microbial hubs explained over 10% of the variation in lifetime seed production among host  
32 genotypes across sites and years. We successfully cultured one of these microbial hubs and  
33 demonstrated its growth-promoting effects on plants grown in sterile conditions. Finally,  
34 genome-wide association mapping identified many putatively causal genes with small effects  
35 on the relative abundance of microbial hubs across sites and years, and these genes were  
36 enriched for those involved in the synthesis of specialized metabolites, auxins and the  
37 immune system. Using untargeted metabolomics, we corroborate the consistent association of  
38 variation in specialized metabolites and microbial hubs across field sites. Together, our  
39 results reveal that host natural variation impacts the microbial communities in consistent  
40 ways across environments and that these effects contribute to fitness variation among host  
41 genotypes.

## 42 **Main**

43 Hosts harbor complex microbial communities that are thought to impact health and  
44 development [1]. Human microbiota has been implicated in a variety of diseases, including  
45 obesity and cancer [2]. Efforts are thus underway to determine the host factors shaping these  
46 communities [3,4], and to use next-generation probiotics to inhibit colonization by pathogens  
47 [5]. Similarly, in agriculture, there is great hope of shaping the composition of the microbiota  
48 in order to mitigate disease and increase crop yield in a sustainable fashion. Indeed, the Food  
49 and Agriculture Organization of the United Nations has made the use of biological control  
50 and growth-promoting microbial associations a clear priority for improving food production  
51 [6].

52 Plant-associated microbes can be beneficial in many ways, including improving access  
53 to nutrients, activating or priming the immune system, and competing with pathogens. For  
54 example, seeds inoculated with a combination of naturally occurring microbes were found to  
55 be protected from a sudden-wilt disease that emerged after continuous cropping [7]. Thus, it  
56 would be advantageous to breed crops that promote the growth of beneficial microbes under a  
57 variety of field conditions, a prospect that is made more likely by the demonstration of host  
58 genotypic effects on their microbiota [8–10]. However, microbial communities are complex  
59 entities that are influenced by the combined impact of host factors, environment and microbe-  
60 microbe interactions [11]. Indeed, several studies have found a strong influence of the  
61 environment on estimates of host genotype effects [8,12,13]. Although most, if not all,  
62 studies exploring the influence that host genotype exerts on microbial communities suggest  
63 that such plant control could be beneficial to plant performance, almost nothing is known  
64 about the relationship between host genotype effects on microbial communities and on plant  
65 performance or fitness. As a consequence, the extent to which host plants can control

66 microbial communities to their advantage, especially in a consistent manner across multiple  
67 environments, remains unclear.

68 Here, we combine large-scale field experiments in natural environments, extensive  
69 microbial community analysis, and genome-wide association mapping to: (i) determine how  
70 host genotype affects different microbial community members, and thus shapes the overall  
71 microbiome; (ii) estimate host genotype effects on microbial communities across eight  
72 environments and investigate the contribution of those effects to the performance of plant  
73 genotypes; and (iii) use genome-wide association mapping to identify key pathways that  
74 shape the leaf microbial communities across multiple environmental conditions.

75

#### 76 **Snapshot of microbial community variation**

77 We performed a set of field experiments that included natural inbred lines of *Arabidopsis*  
78 *thaliana* (hereafter “accessions”) originally collected throughout Sweden, mainly in two  
79 climatically contrasted regions of the country (Supplementary Table 1); *A. thaliana* in the  
80 north of Sweden experiences long, snowy winters, and as a consequence plants are typically  
81 found on south-facing slopes of rocky cliffs. *Arabidopsis* populations in the south of Sweden,  
82 on the other hand, tend to be associated with agricultural or disturbed fields that experience  
83 highly variable snow cover over the winter months. We used replicate experiments in four  
84 representative *Arabidopsis* sites, two each in the north (sites NM and NA) and south (sites SU  
85 and SR) of Sweden. Experiments were repeated across two years, for a total of eight  
86 experiments.

87 Each experiment was organized in a complete randomized block design including 24  
88 replicates of 200 sequenced accessions [14], established as seedlings in a mixture of native  
89 and potting soil and timed to coincide with local germination flushes in late summer.  
90 Immediately upon snowmelt in early spring, we sampled and freeze-dried 5 to 6 whole

91 rosettes per accession. DNA was extracted from the freeze-dried rosettes and both the ITS1  
92 portion of the Internal Transcribed Spacer (ITS) and the V5 to V7 regions of the 16S RNA  
93 gene were sequenced to characterize the fungal and bacterial communities, respectively  
94 [9,11,15]. The sequences obtained were clustered into Operational Taxonomic Units (OTUs)  
95 using Swarm to generate community matrices [14] (see “Count table filtering” section in the  
96 methods). The frequency distributions of OTUs were highly skewed, with the top ten most  
97 common OTUs contributing on average 59% of the reads in each experiment (ranging from  
98 45 to 78%). Taxonomic assignments indicate that the fungal communities were dominated  
99 by Leotimycetes and Dothideomycetes while the bacterial communities included high  
100 proportions of Alphaproteobacteria and Actinobacteria (Extended Data Fig. 1).

101 In a principal coordinate analysis, differences between northern and southern sites  
102 explained 10 and 5% of the overall diversity in the fungal and bacterial communities,  
103 respectively, while differences between the two consecutive years explained 5 and 3%. This  
104 level of differentiation among experiments likely underestimates that present in the native  
105 soil, as it has been shown that hosts filter the microbial community to reduce site-to-site  
106 differences [17,18] (Fig. 1). In addition, there may have been a homogenizing effect of using  
107 a combination of local and potting soil. Irrespective of how well our treatments mimicked  
108 natural microbial communities, our analysis of eight common garden experiments permits  
109 assessment of the consistency across time and space of plant genetic effects on their  
110 associated microbial communities.

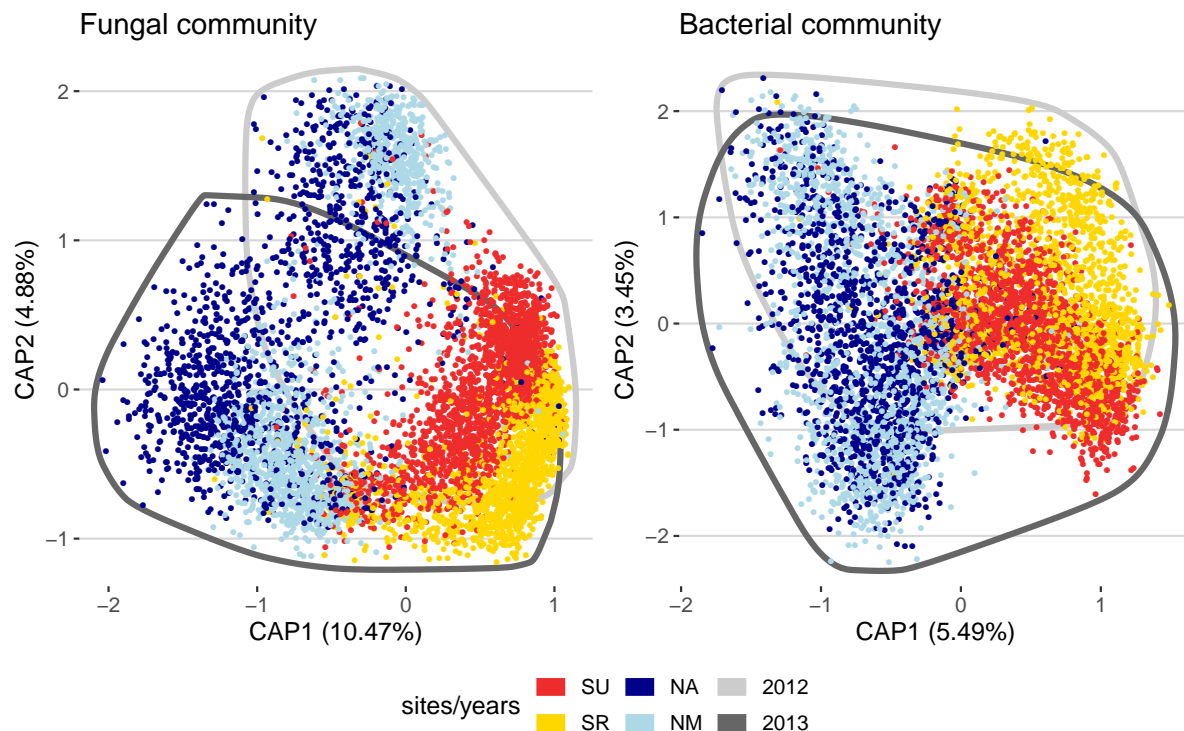

111

112 **Fig. 1 | Plants grown in different environments have different microbial communities.**

113 The plots represent the projection of each sample on the plane defined by the first two  
114 constrained components of the fungal and bacterial communities, describing variation among  
115 sites and years. The percentages in parentheses are the proportion of the total inertia (square  
116 root of the Bray-Curtis dissimilarity) explained by each component. The colors of the points  
117 indicate the site from which samples were collected. Experiments from the South are  
118 represented in red (SU) and yellow (SR), and experiments from the North in light blue (NR)  
119 and dark blue (NA). All points from 2012 and 2013 are encircled by a dark and lighter grey  
120 line respectively.

121

## 122 **Host effects on the microbiota**

123 Our experiments provided a unique opportunity to investigate associations between  
124 host genetic variation and their resident microbiomes, within the context of environmental  
125 variation across time and space. We computed the proportion of variance explained by the  
126 host genotype (hereafter heritability or  $H^2$ ) based on simple unconstrained principal  
127 coordinates (PCoA) within each experiment. Within each experiment, we found significant  
128 heritability of components of the microbial communities (Extended Data Table 1), suggesting  
129 that genetic variation in the host significantly impacts at least a fraction of the microbiota, in  
130 line with results of previous studies [8–11,19,20].

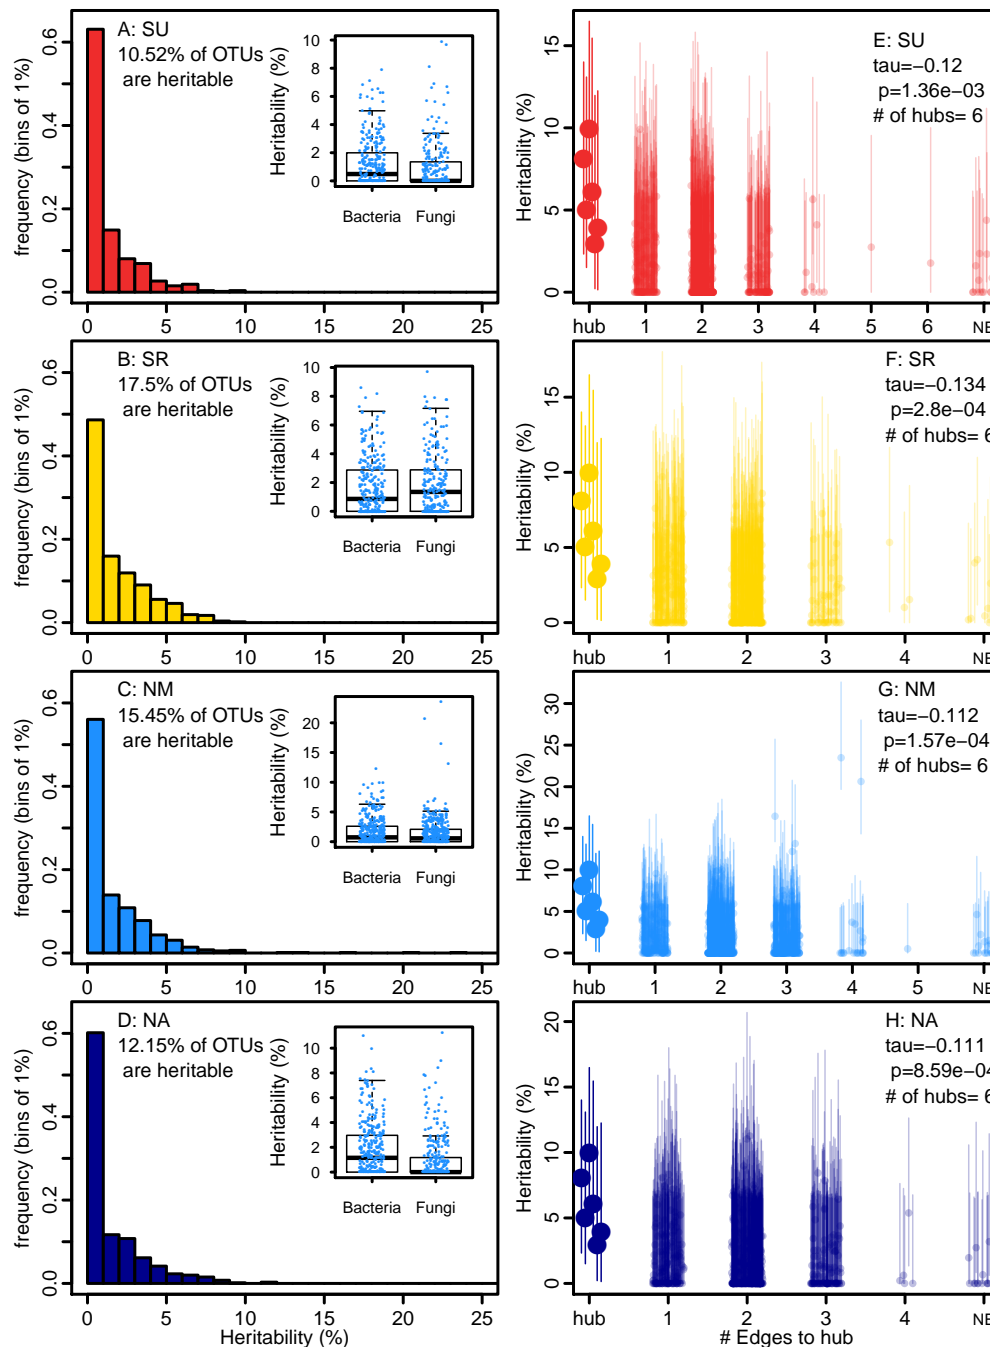

131

132 **Fig. 2 | The effect of host genetic variation on the microbial community targets**  
 133 **relatively few OTUs and percolates through hubs.** This figure corresponds to observations  
 134 in the set of four experiments sampled in 2013, see Extended Data Figure 3 for experiments  
 135 performed in 2012. **A-D:** Each frame presents the distribution of heritability estimates for  
 136 individual OTUs in one site. In each frame, the inset graph is a box and whiskers plot  
 137 contrasting the heritability (y-axis) of bacterial (B) and fungal (F) OTUs. **E-F:** The heritable  
 138 hubs are represented by large dots, at a distance of 0 (hub). The other OTUs are represented  
 139 by smaller dots and the x-axis represents their distance to the nearest heritable hub(s) within  
 140 the sparse covariance networks. The number of heritable hubs detected in each experiment is  
 141 indicated in the legend. The correlation coefficients presented are Kendall rank correlations  
 142 calculated for OTUs with a distance to the heritable hub(s) above 0. NE stands for “no edge”.

143 Significant heritability of principal components could arise from host genotypes  
144 exerting weak control over a large number of community members, or by targeting a few  
145 microbes that then influence the relative abundance of others through microbe-microbe  
146 interactions. Random-effects linear modeling of log-transformed OTU counts revealed  
147 significant genotypic effects (with the 95% confidence interval of heritability not overlapping  
148 0) for between 10.52 and 22.65% of all OTUs, depending on the site and year (Fig. 2A-D and  
149 Extended Data Fig. 2A-D). Thus, the influence of the host appears focused on relatively few  
150 OTUs. We found no evidence that either fungal or bacterial communities are systematically  
151 more impacted by host effects than the other (Fig. 2A-D and Extended Data Fig. 2A-D), nor  
152 that mean relative abundance was strongly correlated with OTU heritability (Extended Data  
153 Fig. 3).

154 Having found that host effects are concentrated on a small proportion of OTUs, we  
155 investigated the possibility that these heritable OTUs trigger a broader community level  
156 change in the microbiota. First, we computed networks of microbe co-occurrence for each  
157 experiment. We explored the ecological importance of heritable OTUs by computing  
158 networks of microbe co-occurrence for each experiment using the SPIEC-EASI pipeline [21].  
159 Although our networks included both fungal and bacterial OTUs, most microbe-microbe  
160 interactions occurred within each domain, with an average of only 8.71 [min=6.94,  
161 max=10.38]% of edges connecting fungal and bacterial OTUs. We quantified the ecological  
162 importance of OTUs using two common characteristics of nodes in a network ( “Degree” and  
163 “Between-ness centrality”) [11], defining ecologically important “hubs” in each network as  
164 OTUs in the 95% tail of both of these statistics (Extended data Fig. 4). We identified on  
165 average 16.5 microbial hubs per experiment (ranging from 11 to 24), representing 77 unique  
166 OTUs across all eight experiments. These hubs were connected to an average of 20.09  
167 [min=14.50, max=25.23]% of the edges in the networks, indicating that they are likely



168 important in structuring the microbial community. In addition, hubs were involved in  
169 proportionally more interactions between fungi and bacteria than the rest of the community  
170 (Extended Data Table 3).

171 Next, we asked whether heritable OTUs are more likely to be ecological hubs,  
172 because this could open the door to community-level impacts. Across all eight experiments,  
173 we detected 23 OTUs that were both heritable and hubs at least once (Extended Data Table 2,  
174 Supplementary Table 2). This represents a significant enrichment of hub OTUs amongst  
175 heritable OTUs (Wilcoxon rank sum test:  $N=8$ ,  $W=57$ ,  $p$ -value= 0.00699), suggesting that  
176 host effects on the microbiota preferentially influence the relative abundance of ecologically  
177 important microbes. In fact, hub OTUs were often among the OTUs with the highest  
178 heritability within each experiment.

179 Finally, we sought evidence of community level impacts of heritable hubs by  
180 mapping heritability onto the ecological network. In six out of eight experiments, we  
181 observed a significant negative relationship between heritability and the distance (number of  
182 network edges) to the nearest heritable hub (combined  $p$ -value= $4.104e^{-15}$ , using Fisher's  
183 method for combining  $p$ -values)[22](Fig. 2E-H and Extended Data Fig. 2E-H). This suggests  
184 that host genetic variation most strongly affects a few microbial hubs that then influence  
185 other microbes, most likely through microbe-microbe interactions.

186 Not only do heritable hubs have an impact that appears to percolate through the  
187 microbial community, they tend to be widely distributed among accessions, sites and years.  
188 We were able to identify 278 fungal and bacterial OTUs that were found in at least 50% of  
189 samples in all experiments. Interestingly, OTUs that were heritable hubs at least once were  
190 over-represented in this core microbiota ( $\chi^2=34.68$ ,  $df=1$ ,  $p$ -value= $3.891e^{-9}$ ). This was not an  
191 artifact of their being widespread; significant heritability estimates were detected across the  
192 entire range of prevalence, with prevalence of an OTU explaining less than 1.4% of OTU

193 heritability across all experiments (F-statistic=29.48, df=4176,  $p$ -value=5.964e-08, Extended  
194 Data Figure 5). Thus, ecologically important OTUs with greatest associations to host  
195 genotypes were unusual in being widespread among plants in multiple experiments. Host  
196 effects on the fungal OTU #8 (hereafter F8) are especially important; this OTU was heritable  
197 in five out of the seven experiments in which it was a hub (Extended Data Table 2),  
198 suggesting that natural variation in *A. thaliana* influences its microbiota with some  
199 consistency across environments. The widespread prevalence of these heritable hubs suggests  
200 that variation at particular host genes associate with particular hubs across time and space,  
201 potentially providing a means to impact the microbiota in a robust fashion.

## 202 **Variation in performance of host genotypes explained by their influence on microbial** 203 **hubs**

204       The extent to which natural variation among host genotypes in their associated  
205 microbes translates into fitness differences has yet to be determined. Our experiments  
206 included additional replicates of all genotypes that were left to flower and mature in the field.  
207 We harvested mature stems in early summer and used high-throughput image analysis to  
208 estimate lifetime seed production (LSP) from mature stem size, using an independently  
209 validated method (Extended Data Fig. 6) [23]. We observed that plant LSP estimates were  
210 positively correlated across experiments (Extended Data Fig. 7), suggesting fitness variation  
211 among accessions was relatively consistent across sites. We therefore asked whether host  
212 effects on microbial hubs contributed to some genotypes producing more seeds across all  
213 environments investigated. Specifically, we used random intercept models to estimate  
214 genotype effects on both heritable microbial hubs and LSP in a series of analyses that jointly  
215 considered all eight experiments and investigated the relationship between these two effects  
216 (see methods “Heritable hubs and LSP across environments”).

217 We found that the host genotype explained, on average, 6.88% (with a 95%  
218 confidence interval [5.52, 8.34]) of our estimate of plant LSP. Host genotype effects (blups)  
219 on the relative abundances of 19 of our 23 heritable microbial hubs were similarly modest,  
220 explaining up to 4% of the variation (Fig. 3A, four heritable hubs were not detected in more  
221 than 2 experiments and were removed for this analysis). In order to estimate genetic  
222 correlations between host genotype effects on LSP and on microbial hubs, we performed a  
223 multiple regression. After using model selection to identify significant relationships, we  
224 detected positive correlations between accession effects on LSP and accession effects on  
225 three heritable hubs, F8, B38 and B13, as well as a negative correlation between accession  
226 effects on LSP and accession effects on F5 (Fig. 3B). The variation explained by host  
227 genotype on the relative abundances of microbial hubs explained 12.4% of the host genotype  
228 effects on LSP.

229 These results reveal that a sizable percentage of genetic variance in LSP is shared  
230 with genetic variation associated with the relative abundance of a few broadly distributed  
231 microbial hubs, consistent with a causal relationship between genotype and LSP mediated by  
232 heritable microbial hubs. Of course, the proportion of shared genetic variation between LSP  
233 and heritable microbial hubs is unlikely to be equally important across time and space. In  
234 fact, in analyses performed on an experiment-by-experiment basis, we found that  
235 relationships between host effects on hubs and LSP were stronger in southern Sweden, where  
236 we detected significant relationships in both sites and both years (Extended data Table 4).

237 Overall, our results highlight the importance for plants to control their leaf microbial  
238 community and suggest that breeding plants for their effects on specific members of  
239 microbial communities has the potential to significantly increase plant productivity.

**A** Heritability of microbial hubs across sites and years

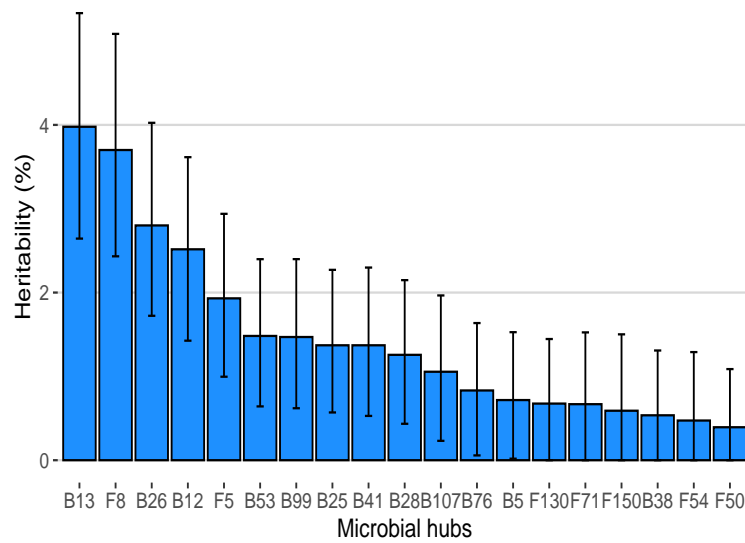

**B** Genotype effects on microbial hubs explained 12.4 % of genotype effects on seed production

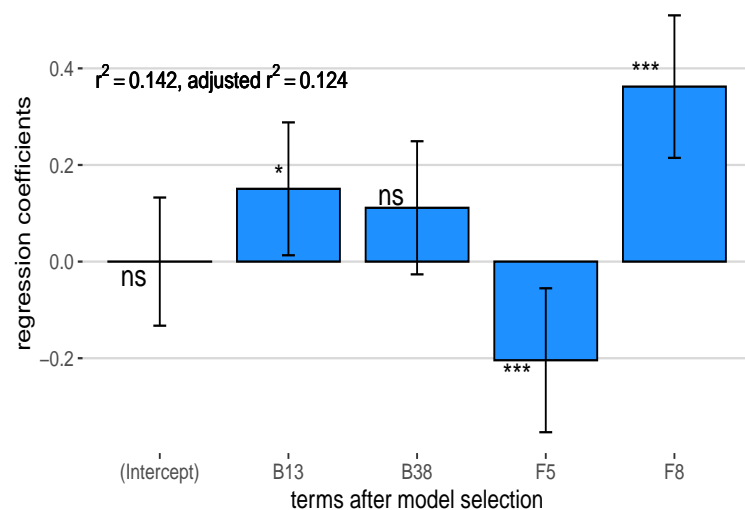

240

241 **Fig. 3 | Relationship between host genotype seed production and influence on microbial**  
 242 **hubs across sites and years.** **A.** Proportion of heritable hub relative counts explained by host  
 243 effects across all sites and years. **B.** Coefficients for the linear regression explaining lifetime  
 244 see production variation among accession with accession effects on microbial hubs across  
 245 experiments (after model selection).  
 246

247 **Effect of hubs on growth in controlled condition**

248 In an effort to verify the correlations between host performance and the relative abundance of  
 249 microbial hubs, we returned to the field to collect wild *A. thaliana* leaves [24], cultured  
 250 approximately 2400 microbial isolates from within these leaves, and sequenced both the 16S

251 RNA gene and gyrase-B. Among heritable hubs, only B38 was successfully cultured; this  
252 isolate derived from Vårhallarna, in southern Sweden, and was identified by a 100% match in  
253 16S sequencing (Extended data Table 5). We subsequently performed shotgun whole genome  
254 sequencing of B38 which we identified as *Brevundimonas sp.* The assembled and annotated  
255 genome did not identify putative pathogenic or virulence genetic factors present in the  
256 genome.

257         To test the effects of B38 on host growth, we grew *Arabidopsis* plants of an accession  
258 (#6136) from the South of Sweden chosen to have intermediate relative abundance of B38 in  
259 the field. Plants were grown under sterile conditions in ½ MS media under long day  
260 conditions in the growth chamber, with and without B38 inoculation. Approximately two  
261 weeks after germination, over 600 plants were randomly selected for either drip inoculation  
262 with the control or B38 inoculum, and measured for surface area growth over the following  
263 two weeks. Accounting for variation in plant growth among trials and plates within trials, we  
264 found that plants treated with B38 grew 5.375 (standard error=1.973) mm<sup>2</sup> larger than control  
265 plants ( $F=7.3981$ ,  $df=1$ ,  $p\text{-value}=6.7e^{-3}$ ) between day 7 and 14, corresponding to a 10.22%  
266 growth increase.

267         The microbial hubs could in principle influence host fitness directly, for example by  
268 contributing to growth, or indirectly through their influence on other beneficial members of  
269 the microbial community [25]. Here we show that B38 directly improves host growth over  
270 early life stages in isolation from the rest of the microbial community. This result is  
271 consistent with our field observations, where we found a positive correlation between genetic  
272 variation associated with B38 and with LSP, suggesting that in this instance the correlation is  
273 causative. The possibility of additional indirect interactions in the field cannot, of course, be  
274 excluded.

275

276 **Mapping the genetic bases of consistent variation in the relative abundances of**  
277 **microbial hubs across experiments**

278 Our observation that host control of the relative abundances of four microbial hubs  
279 explains ~12% of variation in LSP among *Arabidopsis* genotypes grown in 8 field trials  
280 suggests the potential to reveal host genes that can enhance plant performance in the presence  
281 of microbes, particularly across environments. Towards this end, we performed genome-wide  
282 association mapping for host genotype effects on microbial hubs (N=19) and LSP across all  
283 experiments. Despite significant differences among accessions, GWAs yielded few peaks  
284 with *p*-values below accepted significance thresholds after correction for multiple testing.  
285 Specifically, we found only two significant associations, both for microbial hub B41. The  
286 first is located on chromosome 1 at position 29909876 in AT1G79510 annotated as a pseudo-  
287 gene. The second is on chromosome 4 on positions 15704377, 15704472 and 15704478.  
288 These consecutive SNPs are located between *YUC-1* (AT4G32540), involved in auxin  
289 biosynthesis, and *LEUNIG* (AT4G32551), involved in the development of the leaf blade and  
290 floral organs.

291 A potentially more powerful strategy to detect minor QTL involves computing local  
292 association scores along the genome. The assumption underlying this method is that  
293 neighboring markers in linkage disequilibrium with causal mutations will also carry  
294 association signals; thus, aggregating *p*-values increases power [26]. This method identified  
295 340 non-overlapping loci (hereafter QTLs), with sizes ranging from 93 to 150,926 bp  
296 including a total of 25,529 SNPs. Out of the 340 QTLs, only 27 included SNPs associated  
297 with multiple traits (Supplementary Table 3), suggesting a modest level of pleiotropy.

298 To investigate functions underlying these associations, we tested pathway and GO  
299 term enrichment (Biological processes only)[27,28]. Using a combination of methods  
300 accounting for multiple testing, overlapping gene lists, and the potential aggregation of

301 functions and associations along the genome [29–32], we identified 29 enriched GO terms  
302 related to biological processes across 16 traits (Supplementary Table 4 and 5), including four  
303 genes involved in the response to virus (GO:0009615) and nematodes (GO:0009624),  
304 hypersensitive response (GO:0009626) and response to chitin (GO:0010200), all of which are  
305 related to interactions with other organisms. Three enriched GO terms directly concern  
306 auxins and their transport (GO:0009926, GO:0010540, GO:0009734); auxins have  
307 previously been documented to contribute to shaping plant interactions with beneficial  
308 bacteria [33,34]. Specialized metabolites also appear involved in shaping the relative  
309 abundance of microbial hubs. Indeed hub B107 is associated with genes in the geranylgeranyl  
310 diphosphate metabolism (GO:0033385), the universal precursor of monoterpenes, which are  
311 volatile compounds with anti-microbial properties, [see 35 for a review] that potentially  
312 shape within rosettes microbial communities. In addition, loci associated with B76 are  
313 enriched in genes related to specialized metabolite biosynthesis (GO:0044550) and genes  
314 involved in the synthesis of sinapoyl glucose and sinapoyl malate (PWY-3301), an  
315 intermediate in the synthesis of phenylpropanoids. Genes involved in the synthesis of  
316 glucosinolates from phenylalanine (#11 Bz [36] aka glucotropaeolin, PWY-2821) and  
317 hexahomomethionine (specifically #69 mSOo [36] aka 8-(methylsulfinyl)octyl-glucosinolate  
318 PWYQT-4475) are also enriched in loci associated with B5 and F71, respectively.

319         The functions highlighted by our analysis are in line with other studies suggesting the  
320 involvement of specialized metabolites, auxins and the immune system in influencing the  
321 leaf microbial communities [37,38]. Our analysis also highlights less obvious players, like  
322 growth lipid metabolism and brassinosteroids (Supplementary Table 5). This is especially  
323 true with regard to beneficial members of the community. For example, loci associated with  
324 the relative abundance of the beneficial microbial hub B38 are enriched for transition metal

325 ion transport (GO:0000041), response to carbohydrates (GO:0009743), and fatty acid  
326 biosynthesis (PWY-4381).

### 327 **Plant specialized metabolites correlated with microbial hub abundance**

328 Our biological processes and pathway enrichment analysis suggest that specialized  
329 metabolites are involved in shaping microbial hubs. To support this result, we quantified 20  
330 abundant compounds using untargeted metabolomics in a subset of the field samples in which  
331 we characterized the rosette microbiome. We found that the relative abundance of 14 out of  
332 19 hubs were significantly correlated with at least one of 11 specialized metabolites (after  
333 correction for multiple testing), six of which displayed significant heritability in the field  
334 across sites ranging from 1 to 38% (Extended Data Fig. 8A & B).

335 The molecule known as #69 mSOo (here 260\_GSL\_8MSO) displayed the strongest  
336 relationship with multiple microbial hubs in the field (Extended Data Fig. 8A, Extended Data  
337 Table 6), as well as significant heritability under field conditions (Extended Data Fig. 8B).  
338 However, the variation among accessions of this abundant glucosinolate was less evident in  
339 the greenhouse and in sterile conditions (Extended Data Fig. 8B), leaving open the possibility  
340 that the correlation is induced by one or more of the microbial hubs. In contrast, other  
341 molecules significantly related with the abundance of microbial hubs in the field across  
342 experiments (354\_C\_Cy-GRGF\_785 and 358\_F\_R-K-R\_577, Extended Data Table 6) are  
343 heritable in all conditions, and variation among accessions in the field is positively correlated  
344 with the variation among accessions in the greenhouse. This suggests that these flavonoids  
345 are constitutively and consistently produced by accessions and influence microbial hubs in a  
346 manner that is robust to heterogeneity among field experiments.

347

### 348 **Conclusion**

349 In this study, we show that not only does host genetic variation influence the  
350 microbiome, but it does so in consistent ways. Host genotype effects are centered on



351 ecologically important hub species, and percolate through the microbial community, most  
352 likely as a result of microbe-microbe interactions. Our replicate field experiments were likely  
353 instrumental in allowing us to reveal consistent host effects on the leaf microbiome via  
354 common and widespread hub species.

355         Furthermore, we found that the influence of host genetics on a handful of prevalent  
356 microbial hubs has a far-reaching impact on the community, associated with a substantial  
357 fraction of the variation in our fitness estimates among accessions. Although these  
358 relationships are correlational, we were able to culture one of the identified hubs and confirm  
359 a direct positive effect on host fitness experimentally.

360         Understanding how host performance or fitness components are influenced by their  
361 ability to shape microbial communities could provide a basis for breeding crops favoring  
362 microbes that are beneficial both to growth and resistance to pathogens. We successfully  
363 mapped variation in host microbe interactions using genome-wide association, and our results  
364 suggest that natural and artificial selection can act on plant traits such as leaf specialized  
365 metabolites, auxins and the immune system to improve plant performances through effects on  
366 microbial communities [39,40]. In addition, we found that at least some plant metabolites are  
367 expressed in a consistent manner that is robust to variation among our experiments and  
368 correlates with the relative abundance of microbial hubs. Our results therefore suggest that  
369 ongoing efforts to harness the microbiome for agricultural purposes can be successful and  
370 highlight the value of explicitly considering abiotic variation in those efforts.

371

372

373

374 **Methods:**

375

376 **Field experiments**

377 This study uses a set of 200 diverse accessions (inbred lines, Supplementary Table 1)  
378 that were previously re-sequenced [14]. The seeds were produced simultaneously in the  
379 greenhouse of the University of Chicago under long day conditions, except for a 12-week  
380 vernalization period at 4°C, required to induce flowering. The seeds for the common garden  
381 experiments were cold stratified in water at 4°C for 3 days before being planted in trays of 66  
382 open-bottom wells, each measuring 4 cm in diameter. The soil used was a 90:10 mix of  
383 standard greenhouse soil and soil from each of the four sites in which the experiments were  
384 installed:

- 385 - SU: Ullstorp (Agricultural field, lat: 56.067, long: 13.945)
- 386 - SR: Ratchkegården (Agricultural field, lat: 55.906, long: 14.260)
- 387 - NM: Ramsta (Agricultural field, lat: 62.85, long: 18.193)
- 388 - NA: Ådal (South facing slope, lat: 62.862, long 18.331)

389 Each experiment included 3 complete randomized blocks including 8 replicates per  
390 accession. Experiments were sown in pairs (2 in the North and 2 in the South) over 6 days,  
391 corresponding to the sowing of one block a day, alternating between the 2 experiments  
392 (between August 7th and 12th in the North, and between August 31st and September 5th in  
393 the South). The trays were placed in a common garden the morning after sowing under row  
394 tunnels to avoid disturbance by precipitation and to favor germination (on the campus of Mid  
395 Sweden University and Lund University, in the North and in the South, respectively). Trays  
396 were watered as needed and missing seedlings were transplanted between cells within blocks  
397 and then thinned to one per cell after 9 days. Seventeen days after sowing, trays were laid in  
398 the field in their final location over tilled soil. For each experiment, the blocks were laid

399 across the most obvious environmental gradient (exposition, shading, slope, soil humidity...).

400 The pierced bottom of the cells allowed the roots to grow through and reach the soil, as was

401 verified upon harvest. The same protocol was followed in 2011 and 2012.

#### 402 **Sample collection and processing**

403 The rosettes used to characterize the microbial community were harvested in the

404 spring of 2012 and 2013 only a few days after the plants were exposed, following snow melt.

405 We harvested 2 randomly selected replicates per accession in each experimental block. Upon

406 harvest, the roots were removed and the rosettes were washed twice in successive baths of TE

407 and 70% ethanol to remove loosely attached microbes from the leaf surface. The rosettes

408 were then placed in sealed paper envelopes and placed on dry ice. The rosettes were kept at -

409 80°C until lyophilized. Freeze-dried rosettes were then transferred to 2 ml tubes along with 3

410 2mm silica beads. For 2 successive years, the tubes were randomized and separated in 34 and

411 46 sets of 96 tubes, respectively. Our randomization strategy maintained approximately the

412 same number of tubes from each of the 12 experimental units (3 blocks in 4 experiments) in

413 order to avoid confounding biologically meaningful effects. We powdered the samples using

414 a Geno/Grinder® (from Spex SamplePrep, USA, NJ) for 1min at 1750rpm, before

415 transferring 10 - 20 mg to 2ml 96-well plates, along with two zirconia/silica beads (diameter

416 = 2.3mm), for DNA extraction.

#### 417 **DNA extraction**

418 DNA extraction started with 2 enzymatic digestions to maximize yield from Gram-

419 negative bacteria [41]. First, we added 250µl of TES with 50 units.µl<sup>-1</sup> of Lysozyme (Ready-

420 Lys Lysozyme, Epicenter) to each well. The plates were then shaken using the Geno-Grinder

421 for 2 min at 1750 rpm, briefly spun and incubated 30 min at room temperature. Second, we

422 added 250µl of TES with 2% SDS and 1 mg.mL<sup>-1</sup> of proteinase K. The plates were then

423 briefly vortexed and incubated at 55°C for 4 hours. The protocol then followed [42], adapted  
424 to the 96-well plate format and automated pipetting on a Tecan Freedom Evo Liquid Handler.  
425 We added 500 µl of Chloroform:Isoamyl Alcohol (24:1), pipette mixed, and centrifuged the  
426 plates at 6600 g for 15 min. We transferred 450 µl of the aqueous supernatant to a new plate  
427 containing 500µl of 100% isopropanol. The plates were then sealed, inverted 50 times,  
428 incubated at -20°C for 1 hour, and centrifuged at 6600 g for 15 min. The Isopropanol was  
429 then removed and the pellets were washed twice with 500 µl of 70% Ethanol, dried and re-  
430 suspended in 100 µl of TE. After 5 min incubation on ice, the plates were centrifuged 12 min  
431 at 6600 g and the supernatant was pipetted into a new plate.

### 432 **PCR and Sequencing**

433 To describe the microbial communities, we amplified and sequenced fragments of the  
434 taxonomically informative genes *16S* and *ITS* for bacteria and fungi, respectively. For  
435 bacteria we amplified the hypervariable regions V5, V6 and V7 of the *16S* gene using the  
436 primers 799F (5'-AACMGGATTAGATACCCCKG-3') and 1193R (5'-  
437 ACGTCATCCCCACCTTCC-3') [9,43]. For fungi, we amplified the ITS-1 region using the  
438 primers ITS1F (5'-CTTGGTCATTTAGAGGAAGTAA-3') [15] and ITS2 (5'-  
439 GCTGCGTTCTTCATCGATGC-3') [44]. To the 5' end of these primers we added a 2bp  
440 linker, a 10bp pad region, a 6bp barcode and the adapter to the Illumina flowcell, following  
441 [45]. The appropriate linkers were chosen using the PrimerProspector program [46]. The PCR  
442 reactions were realized in 25 µl including: 10 µl of Hot Start Master Mix 2.5x (5prime), 1µl  
443 of a 1/10 dilution of the DNA template, 4µl of SBT-PAR buffer, and 5 µl of the forward and  
444 reverse primers (1 µM). The SBT-PAR buffer is a modified version of the TBT-PAR PCR  
445 buffer described in [47] with the trehalose replaced by sucrose (Sucrose, BSA, Tween20).  
446 The PCR program consisted of an initial denaturing step at 94°C for 2'30", followed by 35  
447 cycles of a denaturing step (94°C for 30"), an annealing step (54.3°C for 40"), and an

448 extension step (68°C for 40”). A final extension step at 68°C was performed for 7’ before  
449 storing the samples at 4°C. For each plate, the PCRs were performed in triplicates, pooled,  
450 and purified using 90 µl of a magnetic bead solution prepared and used following [48]. The  
451 purified PCR products were quantified with Picogreen following the manufacturer's  
452 instruction [49] and pooled into an equimolar mix. Between 5 and 7 plates (480 to 672  
453 samples) were pooled in each MiSeq run. If the bioanalyzer traces for pooled libraries  
454 showed only one dominant peak, they were sequenced directly following the standard MiSeq  
455 library preparation protocols for amplicons. In cases where the bioanalyzer trace presented  
456 peaks for smaller fragments (remaining primers, primer dimers, small PCR products), the  
457 libraries were first concentrated 20X on a speedvac (55°C for 2 to 3 hours), purified with 0.9  
458 volume of magnetic bead solution, and/or size selected using a Blue Pippin (range mode  
459 between 300 and 800 bp).

460         The sequencing was performed using MiSeq 500 cycle V2 kits (251 cycles per read  
461 and 6 cycles of index reads twice), using a loading concentration of 12.5pM for *ITS*  
462 fragments and 8pM for *16S* fragments following the standard Illumina protocol. Sequencing  
463 primers were designed and spiked in following [45]. The sequencing primer for the first read  
464 of *16S* fragments was prolonged into the conserved beginning of the fragment amplified to  
465 reach a sufficient melting temperature. This primer modification produced no change in the  
466 Blast results of the primers against the GreenGene database. A total of 11 sequencing runs  
467 were performed for each of the fungal and bacterial communities.

468

#### 469 **Sequence processing and clustering**

470         The demultiplexed fastq files generated by MiSeq reporter for the first read of each  
471 run were quality filtered and truncated to remove potential primer sequences and low quality  
472 basecalls using the program cutadapt [50]. The reads were then further filtered and converted

473 to fasta files using the FASTX-Toolkit (-q 30 -p 90 -Q33). The fasta files for each run were  
474 then de-replicated using AWK code provided in the swarm git repository  
475 (<https://github.com/torognes/swarm>)[16]. The resulting de-replicated fasta files were filtered  
476 for PCR chimeras using the vsearch uchime\_denovo command  
477 (<https://github.com/torognes/vsearch>). The de-replicated fasta files for each run were then  
478 combined and further de-replicated at the study level. The fasta files were then used as input  
479 for OTU clustering using swarm (-t 4 -c 20000). The clustering identified 150,412 and  
480 251,065 OTUs for the fungal and bacterial communities, respectively. The output files were  
481 combined into two separate community matrices using a custom python script (available at  
482 <https://bitbucket.org/bbrachi/microbiota.git>). The taxonomy of each OTU was determined  
483 using the quime2 2019.1 v8 feature classifier trained on the UNITE V6 and SILVA 119  
484 database for Bacteria and Fungi, respectively [51,52].

485

#### 486 **Count table filtering**

487 The count tables obtained for both the bacterial and fungal communities were filtered in  
488 successive steps by removing:

- 489 1) samples corresponding to empty wells and additional plant genotypes present in the  
490 experiments sampled by mistake (leaving 7476 and 7240 samples for the fungal and  
491 bacterial count tables, respectively).
- 492 2) samples with less than 1000 reads (leaving 6678 and 6819 samples for the fungal and  
493 bacterial count tables, respectively)
- 494 3) OTUs represented by less than 10 read in 5 samples (leaving 1381 and 993 OTUs for  
495 the fungal and bacterial count tables, respectively)
- 496 4) for the bacterial community, OTUs assigned to plant mitochondria (leaving 993 OTUs  
497 in the bacterial count table, no OTUs assigned to plant mitochondria)

498 5) for a second time, samples with less than 1000 reads (leaving 6656 and 6783 samples  
499 for the fungal and bacterial count tables, respectively).

500 The final count tables used in the study included 993 OTUs and 6783 samples for the  
501 bacterial communities and 1381 OTUs and 6656 samples for the fungal community.

502

### 503 **Differentiation of the microbial communities among sites and years**

504 This analysis was performed for the fungal and bacterial communities independently,  
505 including all samples and only OTUs with read counts above 0.01% of total read counts (after  
506 the filtering described above) across sites and years. To investigate how the microbial  
507 communities differed among sites and years, we performed a constrained ordination on log  
508 transformed read counts using the capscale function in the R-package Vegan [53] and  
509 following [54]. The log transformation offers the advantage of removing large differences in  
510 scale among variables. The capscale function performs canonical analysis of principal  
511 coordinates, an analysis similar to redundancy analysis (rda), but based on the decomposition  
512 of a Bray-Curtis dissimilarity matrix among samples (instead of euclidean distance in the  
513 case of rda). This allows identification of the dimension that maximized the variance  
514 explained by components, while discriminating groups of samples, here sites and years [54].

### 515 **Core microbiota**

516 In order to define a core microbiota, we counted, for each OTU, the number of  
517 site/year combinations in which it was prevalent. We defined “prevalent” as being present in  
518 at least 50% of the samples in a given site/year. We performed this analysis using count  
519 tables for each experiment with the filtering described in the previous paragraph. Therefore,  
520 for an OTU to be designated as a member of the core microbiota, it needed to have non-zero  
521 counts in more than 50% of the samples within each site/year combinations and, due to

522 previously described filtering, needed to be represented by at least 10 reads in 5 of those  
523 samples across all site/year combinations (see “Count table filtering”).

#### 524 **Heritability of the microbiota**

525 In this analysis, count tables were split per site and year before filtering for OTUs  
526 represented by more than 0.01% of the reads (after the filtering described in the section  
527 “Count table filtering”) for each of the bacterial and fungal communities. The resulting 16  
528 count tables were normalized to 1000 reads per sample and used to calculate 16 Bray-Curtis  
529 pairwise dissimilarity matrices among samples. These matrices were then decomposed into  
530 10 principal coordinates. For each component we estimated broad sense heritability (hereafter  
531  $H^2$ ), *i.e.* the proportion of variance explained by a random intercept effect capturing the  
532 identity of the accessions present in the experiment (plate effects had limited impact on  $H^2$   
533 estimates but were included in the models). Mixed models were fitted using the function lmer  
534 in the lme4 R package [55]. We computed 95% confidence intervals using 1000 bootstraps,  
535 and components were considered to have significant  $H^2$  when their confidence  
536 intervals did not overlap 0 (lower bound of the confidence interval  $\geq$   
537 0.01).

#### 538 **Heritability of individual OTUs**

539 This analysis was also performed per site, year and community, as in the microbiota  
540  $H^2$  estimation analysis. In this analysis, counts were transformed to centered log-ratios using  
541 a dedicated function in the R package mixOmics [56,57].  $H^2$  estimates and confidence  
542 intervals were computed for individual OTUs using the method described in the previous  
543 paragraph (without the plate effect).  $H^2$  estimates for our estimate of LSP (see below) were  
544 estimated the same way using a box-cox transformation.

#### 545 **Microbe–microbe interaction networks**



546 Microbe-microbe interaction networks were computed for the fungal and bacterial  
547 communities together, using the count tables per site/ year and filtering OTUs represented by  
548 less than 0.01% of the reads within each community. The count tables were then combined  
549 into the same table and analyzed using the SPIEC-EASI (v1.1) pipeline [21]. This method  
550 computes sparse microbial ecological networks in a fashion robust to compositional bias and  
551 uses conditional independence to identify true ecological interactions, meaning that a  
552 connection between 2 OTUs will be significant when one provides information about the  
553 other, given the state of all other OTUs in the network. This means that covariance among  
554 OTUs induced by micro-environmental and host genetic variation is controlled. SPIEC-EASI  
555 was run using the neighborhood selection framework and model selection was regularized  
556 with parameters set to a minimum lambda ratio of  $1e^{-2}$  and a sequence of 50 lambda values  
557 (see documentation for SPIEC-EASI and the huge R package, which provides regularization  
558 functions)[58].

### 559 **Network statistics**

560 The inferences of microbe-microbe ecological interactions inferred using SPIEC-  
561 EASI were passed to the igraph package [59], which was used for enforcing simplicity of  
562 graphs (no loops or duplicated edges), computing degree and betweenness centrality of  
563 vertices, computing distances between vertices, and plotting. Within each of the 8 networks  
564 thus computed, hubs were defined as OTUs with degree and betweenness centrality both in  
565 the 5% tail of their respective distributions. We then checked the overlap between heritable  
566 OTUs and hubs, and the over-representation of heritable OTUs among hubs was tested using  
567 a simple  $\chi^2$  test across all site/year combinations. The relationship between distances to  
568 heritable hubs (OTUs that are both hubs and have significant  $H^2$ ) and heritability was  
569 investigated using Spearman's rank correlation coefficient. Distances were calculated as the  
570 number of edges between OTUs and the closest heritable hub in the network. OTUs not

571 connected to heritable hubs were assigned a distance equal to one more than the maximum  
572 distance observed for OTUs connected to heritable hubs.

### 573 **Estimation of seed production**

574 The experiments each included 8 replicates per block per accession (24 replicates per  
575 experiment). While we harvested 2 replicates per block (6 replicates per experiment) for  
576 microbiota analysis, the remaining plants were left to grow, flower and produce seeds in the  
577 field. We harvested the mature stems of all remaining plants at the end of the spring, when all  
578 plants had finished flowering and siliques were mature, and stored them flat in individual  
579 paper envelopes. We estimated lifetime seed production (LSP) by the size of the mature stems.  
580 After removing remaining traces of roots and rosettes, each mature plant was photographed  
581 on a black background, using a DSLR camera (Nikon 60D) mounted on a copy-stand and  
582 equipped with a 60mm macro lens (Nikon 60mm). The photographs were segmented (using  
583 custom scripts in R based on the EBImage package [60] to isolate plants from the image  
584 background and estimate the total surface of the image they occupied.

585 We validated this method with mature plants harvested from a previous experiment  
586 that was planted in NM in fall 2010, and that included the 200 accessions used in this study.  
587 We counted siliques and estimated the average silique size for 1607 mature stems that were  
588 also photographed. The total silique length produced per plant (number \* average size) was  
589 highly correlated with our size estimates based on image analysis (Spearman's  $\rho=0.84$ ) and  
590 displayed a clear linear relationship.

### 591 **Relationship between host effects on microbial hubs and fecundity**

592 To investigate the relationship between host genotype effects on heritable hubs and  
593 LSP in each experiment, we computed estimates of accession effects (Best unbiased linear  
594 predictors or BLUPs) for both log-ratio transformed heritable hubs and box-cox transformed  
595 LSP estimates. We then fitted multiple regressions for each site/year combination aiming to

596 explain LSP variation among accessions with their influence over microbial hubs and  
597 following **eq. 1**.

$$598 \quad f_i \sim \sum_{j=1}^n [(\beta_j \cdot h_{ij}) + (\gamma_j \cdot h_{ij}^2)] + \varepsilon_i \quad (\text{eq.1})$$

599 where  $f_i$  is the LSP estimate of the  $i^{\text{th}}$  accession (blup),  $h_{ij}$  is the effect of the  $i^{\text{th}}$  accession on  
600 the  $j^{\text{th}}$  hub.  $\beta_j$  is the regression coefficient for the  $j^{\text{th}}$  hub ( $h_j$ ) and  $\gamma_j$  is the regression  
601 coefficient for the  $j^{\text{th}}$  hub squared.  $\varepsilon_i \sim \mathcal{N}(0, \sigma^2)$  captures residual variance per accession.  
602 We then performed forward/backward model selection to obtain the final models presented in  
603 (Extended Data Table 4).

604

#### 605 **Heritable hubs and LSP across environments**

606 We next investigated host effects on heritable hubs and LSP across all 8 experiments.  
607 Similarly to previous analyses, count tables were split per site and year before filtering for  
608 OTUs represented by more than 0.01% of the reads (after the filtering described in the section  
609 “Count table filtering”) for each of the bacterial and fungal communities. The resulting 16  
610 count tables were then combined into one before fitting a mixed-model following eq. 2:

$$611 \quad Y_{ijk} \sim \beta \cdot \text{exp}_j + a_k + \varepsilon_i \quad (\text{eq. 2})$$

612

613 where  $Y_{ijk}$  are the transformed counts for a heritable hub measured the  $i^{\text{th}}$  time in experiment  
614  $j$  ( $\text{exp}_j$ ) (N=8, four sites and two years) and for accession  $k$  (N=200),  $\beta$  is the vector of fixed  
615 experiment effects (N=8) and  $a_k \sim \mathcal{N}(0, \sigma_a^2)$  is a random intercept estimated by restricted  
616 maximum likelihood for each accession.  $\varepsilon_i \sim \mathcal{N}(0, \sigma_e^2)$  captures the residual variance.

617 Microbial hub heritability ( $H^2$ ) across experiments was estimated as the percentage of  
618 variance explained by the random accession intercept:

619 
$$H^2 = \frac{\sigma_a^2}{\sigma_a^2 + \sigma_e^2}.$$

620 LSP data was analyzed the same way, except we performed Box-Cox transformation  
621 of the data. The lambda parameter for the Box-Cox transformation was estimated using the  
622 same model, but without the random accession term.

623 For both heritable microbial hubs and LSP, we retrieved random intercept accession  
624 effects (BLUPS) and fitted a multiple linear regression following:

625 
$$F_i \sim \sum_{j=1}^n [(\beta_j \cdot H_{ij}) + (\gamma_j \cdot H_{ij}^2)] + \varepsilon_i \quad (\text{eq. 3})$$

626 where  $F_i$  is the effect of the  $i^{\text{th}}$  accession (N=200) on LSP (across all experiments),  $H_{ij}$  is the  
627 effect of accession  $i$  on hub  $j$  across all experiments,  $H_{ij}^2$  is the squared effect of accession  $i$   
628 on hub  $j$ .  $\beta_j$  and  $\gamma_j$  are the corresponding regression coefficient for hub  $j$  and  $\varepsilon_i \sim \mathcal{N}(0, \sigma^2)$   
629 captures the residual variance per accession. The final model was obtained after  
630 backward/forward model selection based on AIC.

631

### 632 **Isolation, culture and identification of microbial hubs**

633 ***Bacteria sampling from wild *A. thaliana* plants:*** We collected 2 leaves from 10  
634 plants at 5 locations in Sweden (Extended data Table 5). The leaves were first cleaned by  
635 rinsing individually in ddH<sub>2</sub>O, and subsequently surface-sterilized by dipping 70% EtOH for  
636 3-5 seconds. The leaves were ground in individual 1.5 mL tubes. The leaf material was stored  
637 in 20% glycerol at -20°C. Wild *A. thaliana* microbial isolates were collected using modified  
638 methods that were previously described (Bai et al 2015). Briefly, the leaf and glycerol  
639 mixture was plated on nine distinct media, including; R2A, Minimal media containing  
640 Methanol, Tryptic Soy Agar, Tryptone Yeast extract Glucose Agar, Yeast Extract Manitol  
641 Agar [24]; 0.1 Tryptic Soy Agar [61]; Potato Dextrose Agar, 0.2 Potato Dextrose Agar, and

642 Malt Extract Agar [62,63]. Colonies were picked over the next 14 days, restreaked, and  
643 grown in liquid media in an orbital shaker for 1-4 days. A portion of the inoculum was saved  
644 in 15-20% glycerol, and the rest of the liquid culture was pelleted by centrifugation and  
645 decanted for DNA extraction. We performed a double enzymatic digest for all isolates, which  
646 was performed using the Tecan: 30 minute incubation with 350 U Ready-Lyse Lysozyme and  
647 245 U RNase A (QIAGEN, Germantown, MD) in 250ul TES (10 mM Tris-HCl pH ~8, 1 mM  
648 EDTA, 100 mM NaCl), followed by the addition of 2 mg/mL Proteinase K in 250ul TES +  
649 2% SDS and a 4-6 hour incubation at 55C. The SDS-protein complexes were precipitated  
650 with .3 volume 5M NaCl and pelleted by a brief centrifugation. The clear supernatant was  
651 pipetted into a clean plate, and a standard .5 volume SPRI bead DNA extraction was  
652 performed with 2x 70% EtOH washes. Clean DNA was resuspended into MilliQ water. The  
653 samples were then amplified for 16S sequencing using the same primers binding regions as  
654 previously, 799F and 1193R, and sequenced by either Sanger or Illumina MiSeq (PE 300).  
655 Illumina adapters were designed and generated as described by Illumina with internal  
656 barcodes to increase sample count capacity per lane [64]. Isolate B38 was identified by 100%  
657 match to the B38 representative sequence from the previous analysis.

### 658 **B38 whole genome assembly**

659 We used a low-input method for Illumina library prep [Baym]. Briefly, ~2 ng  
660 extracted DNA was used in a reduced volume (5ul) tagmentation reaction with TDE1  
661 (incubate 55C for 10 mins, room temperature for 5 mins). The tagmentation reaction was  
662 added to a 15 ul PCR reaction, adding the Illumina adapters (Kapa HiFi Hotstart PCR kit  
663 KK502, standard Illumina adapters and cycling). The library was cleaned with .8x volume  
664 SPRI beads, quantified on the Bioanalyzer, and run on the MiSeq2500 using paired end 300  
665 chemistry. Reads were trimmed for adapters (BBduk, ktrim=r k=23 mink=11 hdist=1 tbo)

666 and quality across a sliding window (k=4, trimq=20). Reads were assembled using SPAdes (-  
667 isolate) and annotated with PROKKA. **Plant growths assays with B38**

668 **Plant growth:** *Arabidopsis thaliana* accession 6136 from Southern Sweden was used  
669 in the growth assays. In our field experiments it displayed average relative counts for B38  
670 (rank 102 of 199). The plant assay used slightly modified methods as previously described  
671 [65]. The seeds were exposed to chlorine gas for sterilization: in a bell jar with dessicant, an  
672 open 1.5 mL tube with seeds was placed next to a 50 mL beaker with 40 mL Chlorox bleach  
673 and 1 mL hydrochloric acid, sealed with parafilm, and incubated for 4 hours. Sterilized seeds  
674 were subsequently sown on 24-well tissue plates containing 1.5mL of ½ MS media  
675 (Murashige & Skoog medium incl. Nitsch vitamins, bioWORLD, Dublin, Ohio) containing  
676 500mg/L MES, pH 5.7 - 5.8. Plates were wrapped in parafilm, and vernalized in the dark at  
677 4°C for 4 days. The plates were individually wrapped with micropore tape to prevent  
678 environmental contamination and transferred to a growth chamber with 16 hours of light at  
679 16°C. The plants were treated with either B38 or control inoculum between days 13-15 post-  
680 vernalization. The plates were returned to the chamber to grow for another 14 days.

681 **B38 inoculation:** The B38 isolate grew in R2A liquid media in an orbital shaker until  
682 OD<sub>600</sub>=0.2, approximately 3 days. To ensure no environmental contamination, a portion of the  
683 inoculum was saved for DNA extraction and subsequent 16S Sanger sequencing verification.  
684 The liquid cultures were pelleted by centrifuging 1800 RCF 18C for 7 minutes, decanted and  
685 resuspended in 0.1 M MgSO<sub>4</sub>. The plants in each 24-well plate were randomly selected to  
686 receive the infection (B38 + 0.1 M MgSO<sub>4</sub>) or control (0.1 M MgSO<sub>4</sub>) treatment. Each plant  
687 was drip inoculated using pipettes with 180ul of the selected treatment. The plates were re-  
688 wrapped in micropore tape and returned to the growth chamber.

689 **Measuring plant growth:** We performed 3 trials of 11, 28, and 23 plates, totalling 62  
690 24-well plates. Plants were not treated and removed from the experiment if they had less than

691 3 true leaves, cracked agar, or failed to germinate, resulting in a total of 1094 plants. The  
692 plants were individually photographed immediately before inoculation, then again at 7 and 14  
693 days post-inoculation. The images were processed using a custom script employing cv2 in  
694 Python [66], which quantified plant surface area in each well by scaling based on the wells'  
695 size, converting images into binary images, and measuring non-white pixels within each well  
696 (i.e. plant surface area). The output images were manually inspected, and any images which  
697 failed to be accurately processed were manually measured using the same pipeline described  
698 above, but using Image J.

699 Due to the high humidity of the plates and the drip inoculation, 422 plants showed  
700 signs of water log stress. Plants were scored for symptoms of stress induced by water logging  
701 (blindly with regard to B38 inoculation) as categorized by translucent/white leaves or stunted  
702 growth, and were removed from the experiment.

703 We used a linear mixed model (eq. 4) accounting for variation in plant growth among trials  
704 and plates within trials to estimate the effect of B38 inoculation.

$$705 \quad G_{ij} \sim \beta \cdot T_{ij} + p_j + \varepsilon_{ij} \quad \text{(eq. 4)}$$

706 In equation 4,  $G_{ij}$  is the growth of  $i^{\text{th}}$  plant in the  $j^{\text{th}}$  plate/assay combination.  $\beta$  is the estimate  
707 of the treatment effect compared to the controls (intercept) and  $T_{ij}$  is the treatment  
708 (inoculation with a B38 or control solution).  $p_j \sim \mathcal{N}(0, \sigma_p^2)$  the random intercept effect  
709 capturing variation among plates in assays (N=62 plates across three trials).

710  $\varepsilon_{ij} \sim \mathcal{N}(0, \sigma_e^2)$  captures the residual variances.

711

## 712 **Genome-wide association mapping**

### 713 **Single polymorphism calling and filtering**

714           Single nucleotide polymorphisms (SNP) used in this study were generated from the  
715 sequences generated in the context of the 1001genome project [67] and published in  
716 Long, Q. *et al.* [14]. As pipelines evolve, we re-ran SNP calling to ensure optimal quality.  
717           For each sequenced individual, we performed 3' adapter removal (either TruSeq or  
718 Nextera), quality trimming (quality 15 and 10 for 5' and 3'-ends, respectively) and N-end  
719 trimming with cutadapt (v1.9) [50]. After processing, we only kept reads of approximately  
720 half the length of the original read-length. We mapped all paired-end (PE) reads to the *A.*  
721 *thaliana* TAIR10 reference genome with BWA-MEM (v0.7.8) [68,69]. We used Samtools  
722 (v0.1.18) to convert file formats [70] and Sambamba (v0.6.3) to sort and index bam files [71].  
723 We removed duplicated reads with Markduplicates from Picard (v1.101)  
724 (<http://broadinstitute.github.io/picard/>) and performed local realignment around indels with  
725 GATK/RealignerTargetCreator and GATK/IndelRealigner functions from GATK (v3.5)  
726 [72,73] by providing known indels from The 1001 Genomes Consortium ([1001 Genomes](#)  
727 [Consortium 2016](#)). Similarly, we conducted base quality recalibration with the functions  
728 GATK/BaseRecalibrator and GATK/PrintReads by providing known indels and SNPs from  
729 The 1001 Genomes Consortium.  
730           For variant calling, we employed GATK/HaplotypeCaller on each sample in 'GVCF  
731 mode', followed by joint genotyping of a single cohort of 220 individuals with  
732 GATK/GenotypeGVCFs. To filter SNP variants, we followed the protocol of variant quality  
733 score recalibration (VQSR) from GATK. First, we created a set of 191,968 training variants  
734 from the intersection between the 250k SNP array [74] used to genotype the RegMap panel  
735 [75] and the SNPs from The 1001 Genomes Consortium. Second, this training set was further  
736 filtered by the behavior in the population of several annotation profiles (DP < 10686,  
737 InbreedingCoeff > -0.1, SOR < 2, FS < 10, MQ > 45, QD > 20) to leave 175,224 training  
738 high-quality variants. Third, we executed GATK/VariantRecalibrator with the latter as the



739 training set, an *a priori* probability of 15, the maximum number of Gaussian distributions set  
740 at 4, and annotations MQ, MQRankSum, ReadPosRankSum, FS, SOR, DP, QD and  
741 InbreedingCoeff enabled. Finally, we applied a sensitivity threshold of 99.5 with  
742 GATK/ApplyRecalibration and restricted our set to bi-allelic SNPs with  
743 GATK/SelectVariants for a total of 2,303,415 SNPs in the population.

744       Preparation for use in genome-wide association analysis involved further filtering of  
745 individuals and SNPs using Plink1.9 [76,77]. Individuals not included in this study were  
746 removed and SNPs with over 5% missing data and with minor allele frequencies below 5% in  
747 our collection of accessions were removed.

#### 748 **Phenotype preparation and association analysis**

749       Association mapping analyses were performed for the 11 heritable microbial hubs for  
750 which we estimated host genotype effects across experiment and accession LSP estimates.  
751 Association analyses were performed using a classical one trait mixed model accounting for  
752 genetic relatedness among accessions (kinship) [78].

753       In order to take advantage of linkage disequilibrium and gain power by grouping  
754 association statistics in contiguous markers, we computed local association scores [26]. We  
755 followed the instructions provided by the authors and defined the parameter  $X_i$  as the 0.999  
756 quantile of the distribution of  $-\log(p - value) - 1$  rounded to the closest integer for each  
757 trait investigated (19 microbial hubs and LSP). The approach highlights regions, which we  
758 call QTLs.

759       The null association model (without fixed SNP effect) from Gemma allows us to  
760 estimate SNP-based heritability or pseudo-heritability [79], which is the proportion of  
761 variance explained by the random accession effect, accounting for the genetic similarity  
762 among accessions. To investigate if the regions highlighted by the local score approach  
763 included true positives, we computed SNP based heritability for each trait, each time using

764 three sets of SNPs to compute the kinship matrix: 1) All the SNPs in the genome over 10%  
765 frequency, 2) all the SNPs within QTLs identified by the local score approach, and 3) all  
766 SNPs not included in the QTLs identified by the local score approach.

### 767 **Pathway enrichment analysis**

768 To investigate biological functions associated with LSP of accessions or their  
769 influence over microbial hubs, we searched for enrichment in annotated pathways (BIOCYC)  
770 and GO categories (Biological processes only) in *Arabidopsis thaliana*. Gene-set enrichment  
771 methods are designed for assays that directly assign  $p$ -values or effects to individual genes  
772 (i.e. RNAseq experiments). Here, for each trait, each gene was attributed the largest absolute  
773 SNP effect within a distance of 5kb on each side and followed the setRank procedure that  
774 accounts for overlapping categories and multiple testing. We set the parameter “setPCutoff”  
775 to 0.01 and the “fdrCutoff” to 0.05 [29]. To account for specificities of gene set enrichment in  
776 the context of association mapping, we also tested the enrichment of the gene groups  
777 identified by setRank using a weighted Kolmogorov-Smirnov score [30] and a permutation  
778 scheme accounting for the non-independence of marker effects due to linkage disequilibrium  
779 along the genome, as well as the potential clustering of genes with similar function [31,32].  
780 Briefly, enrichment was calculated using a weighted Kolmogorov sum using gene effect rank  
781 (and not a gene effect significance threshold)[30]. Enrichments were then tested against an  
782 empirical distribution generated from  $1e5$  permutations. For each permutation, chromosomes  
783 are randomly re-ordered and re-oriented and the whole genome is shifted (or “rotated”) by a  
784 random number, before re-assigning SNP effects to genes and calculating enrichment for the  
785 groups of genes of interest. We considered only categories with an empirical  $p$ -values below  
786 0.05.

### 787 **Untargeted metabolomics**

### 788 **Plant material and sample preparation.**

789 This analysis uses three sets of samples. The first are samples collected from the  
790 experiments in Sweden and correspond to a subset of those used for the microbial  
791 community. In particular we chose samples from the four experiments established in 2012  
792 and focused on a subset of 50 accessions selected to span the genetic variation among hosts in  
793 our mapping population. The second set of samples correspond to 6 replicates of the same 50  
794 genotypes grown in the University of Chicago greenhouse during the summer 2014 under  
795 long day conditions (16-hour light period), in standard culture soil. After 28 days, plants were  
796 vernalized for three weeks at 4°C and leaf samples were collected after vernalization,  
797 immediately flash frozen in liquid nitrogen, freeze-dried and stored at room temperature. The  
798 third set corresponds to 3 replicates of the same 50 genotypes, grown on sterile agar medium  
799 (Murashige and Skoog with Nitsch vitamins) in individual well plates in a growth chamber  
800 with a 16-hour light period (long day condition). Seeds were sterilized by a 70% ethanol bath  
801 for 10 minutes, and manipulated under a sterile hood. Samples were collected after 28 days of  
802 growth, flash frozen, freeze-dried, and stored at room temperature.

803 Dried samples from the 3 sets were coarsely ground, and distributed in 18 96-well plates with  
804 two ceramic grinding beads per well (10mg per well +/- 2mg). Samples were randomized  
805 across all plates to limit confounding of biological effects. In addition, each plate included 16  
806 random samples (1/6) from each experimental unit (greenhouse, sterile, and the 4 field  
807 experiments).

#### 808 **Specialized metabolite extraction and LC-MS analysis**

809 The extraction protocol was designed to extract polar compounds such as  
810 glucosinolates and flavonoids. Samples in plates were ground using a Geno/Grinder (SPEX  
811 SamplePrep 2010) at 1750 rpm for two minutes. The extraction buffer (70% methanol,  
812 30% water, internal standard: quercetin, 0.0708 mM) was added using a Tecan pipetting  
813 robot

814 (100 µl per milligram of dry material). Samples were shaken at room temperature for two  
815 hours and filtered on 96-well filter plates (0.45µm) on a vacuum manifold. The flow-through  
816 was collected in 96-well plates and stored at 4°C.

817 Samples were auto injected through a Zorbax SB-C18 2.1 × 150  
818 mm, 3.5 µm column on an Agilent Q-TOF LC-MS with dual ESI (Agilent  
819 6520) with the following parameters: 325 °C gas temperature, 6 L min<sup>-1</sup>  
820 drying gas, 35 eV fixed collision energy, 35 psig nebulizer, 68 V skimmer  
821 voltage, 750 V OCT 1 RF Vpp, 170 V fragmentor, and 3500 V capillary  
822 voltage. Mass accuracy was within 2-5 ppm. Samples were eluted with  
823 0.1% formic acid in water (A) and 100% acetonitrile (B) using the following  
824 separation gradient: 95% A injection followed by a gradient to 90% A at 1  
825 min, 45% A at 6 min, 100%B at 6.5 min with 4 min hold and 3 min  
826 equilibration. An external standard (sinigrin, 1mM) was run 4 times before  
827 each plate and one time every 20 samples to monitor and maintain run  
828 quality. Compounds were characterized using retention times and fragmentation patterns of  
829 chromatograms with automatic agile integration in Agilent Mass Hunter Software  
830 (Qualitative Analysis B6 2012) and fragments were compared to online databases, massbank  
831 (massbank.jp) and plantCyc (plantcyc.org). The XCMS package for peak detection in R  
832 (cran.r-project.org) was used to align chromatograms, adjust retention times, and group the  
833 peaks. For every molecule, a “barcode” peak was chosen to have a unique retention time and  
834 mass to charge ratio (m/z) combination. The size of these peaks relative to the internal  
835 standard, Quercetin, was used to quantify each molecule in every sample.

### 836 **Statistical analysis.**

837 The peaks intensities relative to the internal standard were used to capture molecule  
838 concentration variation. Standardized intensities were square-root transformed before

839 analysis. Heritability of individual compounds in the three conditions were performed using  
840 random intercept models identical to those used to estimate OTU heritability. A fixed “site”  
841 effect was added for the field samples. In the greenhouse and sterile conditions, a simple  
842 random accession term was used to quantify heritability and estimate accession effects  
843 (blups). Those accession effects were used to estimate genetic correlation between  
844 specialized metabolites field and greenhouse. We used Pearson’s correlation coefficient and  
845 corrected the corresponding p-values for false discovery rate (FDR, N=20).

846 For the field samples we modeled the relationships between the relative abundances  
847 of 19 microbial hubs and the relative intensity of 20 compounds (Extended Data Table 6)  
848 using a linear models following:

$$849 H_i \sim \beta 1_s \cdot S_{si} + \beta 2 \cdot M_i + \beta 3_s \cdot S_{si} \cdot M_i + \varepsilon_i$$

850 where  $H_i$  are the log-ratio transformed counts of one of the 19 microbial hubs used for  
851 mapping, and  $\beta 1_s$  are the four site effects,  $S_{si}$  is the design matrix assigning sample i to site  
852 s, and  $\beta 2$  is the effect of one of the 20 molecules identified in our untargeted screen,  $M_i$  is the  
853 relative intensity of the molecules measured in sample i.  $\beta 3_s$  are site specific regression  
854 coefficients (interactions between the site and molecule effects). We fitted 380 models (19  
855 hubs and 20 molecules) and used F-tests to estimate term significance. All p-values  
856 corresponding to the molecule effect  $\beta 2$  were corrected for False Discovery Rate (N=380).

857  
858  
859

860 **References:**

861

- 862 1. Opstal EJ v., Bordenstein SR. Rethinking heritability of the microbiome.  
863 Science. 2015;349: 1172–1173. doi:10.1126/science.aab3958
- 864 2. Vétizou M, Pitt JM, Daillère R, Lepage P, Waldschmitt N, Flament C, et al.  
865 Anticancer immunotherapy by CTLA-4 blockade relies on the gut microbiota. Science.  
866 2015;350: 1079–84. doi:10.1126/science.aad1329
- 867 3. Abdul-Aziz MA, Cooper A, Weyrich LS. Exploring relationships between host  
868 genome and microbiome: New insights from genome-wide association studies. Front  
869 Microbiol. 2016;7: 1–9. doi:10.3389/fmicb.2016.01611
- 870 4. Goodrich JK, Waters JL, Poole AC, Sutter JL, Koren O, Blekhman R, et al.  
871 Human genetics shape the gut microbiome. Cell. 2014;159: 789–799.  
872 doi:10.1016/j.cell.2014.09.053
- 873 5. Pamer EG. Resurrecting the intestinal microbiota to combat antibiotic-  
874 resistant pathogens. Science. 2016;352: 535–538. doi:10.1126/science.aad9382
- 875 6. FAO. Sustainable agriculture for biodiversity/biodiversity for sustainable  
876 agriculture. 2016; 48. doi:FAO, 2016- I6602EN/1/12.16
- 877 7. Santhanam R, Luu VT, Weinhold A, Goldberg J, Oh Y, Baldwin IT. Native  
878 root-associated bacteria rescue a plant from a sudden-wilt disease that emerged during  
879 continuous cropping. Proc Natl Acad Sci U S A. 2015;112: E5013-20.  
880 doi:10.1073/pnas.1505765112
- 881 8. Wagner MR, Lundberg DS, Del Rio TG, Tringe SG, Dangl JL, Mitchell-Olds T.  
882 Host genotype and age shape the leaf and root microbiomes of a wild perennial plant.  
883 Nat Commun. 2016;7: 12151. doi:10.1038/ncomms12151
- 884 9. Horton MW, Bodenhausen N, Beilsmith K, Meng D, Muegge BD,  
885 Subramanian S, et al. Genome-wide association study of *Arabidopsis thaliana* leaf  
886 microbial community. Nat Commun. 2014;5: 5320. doi:10.1038/ncomms6320
- 887 10. Peiffer JA, Spor A, Koren O, Jin Z, Tringe SG, Dangl JL, et al. Diversity and  
888 heritability of the maize rhizosphere microbiome under field conditions. Proc Natl Acad  
889 Sci. 2013;110: 6548–6553. doi:10.1073/pnas.1302837110
- 890 11. Agler MT, Ruhe J, Kroll S, Morhenn C, Kim S-T, Weigel D, et al. Microbial  
891 hub taxa link host and abiotic factors to plant microbiome variation. Waldor MK, editor.  
892 PLOS Biol. 2016;14: e1002352. doi:10.1371/journal.pbio.1002352
- 893 12. Rochefort A, Briand M, Marais C, Wagner M-H, Laperche A, Vallée P, et al.  
894 Influence of environment and host plant genotype on the structure and diversity of the  
895 *Brassica napus* seed microbiota. Phytobiomes J. 2019;3: 326–336.  
896 doi:10.1094/PBIOMES-06-19-0031-R
- 897 13. Veach AM, Morris R, Yip DZ, Yang ZK, Engle NL, Cregger MA, et al.  
898 Rhizosphere microbiomes diverge among *Populus trichocarpa* plant-host genotypes  
899 and chemotypes, but it depends on soil origin. Microbiome. 2019;7: 76.  
900 doi:10.1186/s40168-019-0668-8
- 901 14. Long Q, Rabanal FA, Meng D, Huber CD, Farlow A, Platzer A, et al. Massive  
902 genomic variation and strong selection in *Arabidopsis thaliana* lines from Sweden. Nat  
903 Genet. 2013;45: 884–890. doi:10.1038/ng.2678
- 904 15. Gardes M, Bruns TD. ITS primers with enhanced specificity for  
905 basidiomycetes—application to the identification of mycorrhizae and rusts. Mol Ecol.  
906 1993;2: 113–118. doi:10.1111/j.1365-294X.1993.tb00005.x
- 907 16. Mahé F, Rognes T, Quince C, de Vargas C, Dunthorn M. Swarm: robust and  
908 fast clustering method for amplicon-based studies. PeerJ. 2014;2: e593.  
909 doi:10.7717/peerj.593
- 910 17. Beilsmith K, Perisin M, Bergelson J. Natural bacterial assemblages in  
911 *Arabidopsis thaliana* tissues become more distinguishable and diverse during host  
912 development. Ecology; 2020 Mar. doi:10.1101/2020.03.04.958165
- 913 18. Bulgarelli D, Rott M, Schlaeppi K, van Themaat E, Ahmadinejad N, Assenza  
914 F, et al. Revealing structure and assembly cues for *Arabidopsis* root-inhabiting bacterial

- 915 microbiota. *Nature*. 2012;488: 91–95. doi:10.1038/nature11336
- 916 19. Bergelson J, Mittelstrass J, Horton MW. Characterizing both bacteria and
- 917 fungi improves understanding of the *Arabidopsis* root microbiome. *Sci Rep*. 2019;9: 1–
- 918 11. doi:10.1038/s41598-018-37208-z
- 919 20. Deng S, Caddell D, Yang J, Dahlen L, Washington L, Coleman-Derr D.
- 920 Genome wide association study reveals plant loci controlling heritability of the
- 921 rhizosphere microbiome. *bioRxiv*. 2020; 2020.02.21.960377.
- 922 doi:10.1101/2020.02.21.960377
- 923 21. Kurtz ZD, Müller CL, Miraldi ER, Littman DR, Blaser MJ, Bonneau RA. Sparse
- 924 and compositionally robust inference of microbial ecological networks. von Mering C,
- 925 editor. *PLOS Comput Biol*. 2015;11: e1004226. doi:10.1371/journal.pcbi.1004226
- 926 22. Sokal RR, Rohlf FJ. *Biometry. The principles and practice of statistics in*
- 927 *biological research*. 1969. doi:10.1126/science.167.3915.165
- 928 23. Roux F, Gasquez J, Reboud X. The dominance of the herbicide resistance
- 929 cost in several *Arabidopsis thaliana* mutant lines. *Genetics*. 2004;166: 449–460.
- 930 doi:10.1534/genetics.166.1.449
- 931 24. Bai Y, Müller DB, Srinivas G, Garrido-Oter R, Potthoff E, Rott M, et al.
- 932 Functional overlap of the *Arabidopsis* leaf and root microbiota. *Nature*. 2015;528: 364–
- 933 369. doi:10.1038/nature16192
- 934 25. Farrar K, Bryant D, Cope-Selby N. Understanding and engineering beneficial
- 935 plant-microbe interactions: plant growth promotion in energy crops. *Plant Biotechnol J*.
- 936 2014;12: 1193–1206. doi:10.1111/pbi.12279
- 937 26. Bonhomme M, Fariello MI, Navier H, Hajri A, Badis Y, Miteul H, et al. A local
- 938 score approach improves GWAS resolution and detects minor QTL: application to
- 939 *Medicago truncatula* quantitative disease resistance to multiple *Aphanomyces*
- 940 *euteiches* isolates. *Heredity*. 2019;123: 517–531. doi:10.1038/s41437-019-0235-x
- 941 27. Mueller LA, Zhang P, Rhee SY. AraCyc: A Biochemical Pathway Database
- 942 for *Arabidopsis*. *Plant Physiol*. 2003;132: 453–460. doi:10.1104/pp.102.017236
- 943 28. Schläpfer P, Zhang P, Wang C, Kim T, Banf M, Chae L, et al. Genome-Wide
- 944 Prediction of Metabolic Enzymes, Pathways, and Gene Clusters in Plants. *Plant*
- 945 *Physiol*. 2017;173: 2041–2059. doi:10.1104/pp.16.01942
- 946 29. Simillion C, Liechti R, Lischer HEL, Ioannidis V, Bruggmann R. Avoiding the
- 947 pitfalls of gene set enrichment analysis with SetRank. *BMC Bioinformatics*. 2017;18:
- 948 151. doi:10.1186/s12859-017-1571-6
- 949 30. Champi K, Ycart B. Weighted Kolmogorov Smirnov testing: an alternative for
- 950 Gene Set Enrichment Analysis. *Stat Appl Genet Mol Biol*. 2015;14: 279–293.
- 951 doi:10.1515/sagmb-2014-0077
- 952 31. Brachi B, Faure N, Horton M, Flahauw E, Vazquez A, Nordborg M, et al.
- 953 Linkage and association mapping of *Arabidopsis thaliana* flowering time in nature.
- 954 *PLoS Genet*. 2010;6: e1000940. doi:10.1371/journal.pgen.1000940
- 955 32. Atwell S, Huang YS, Vilhjálmsson BJ, Willems G, Horton M, Li Y, et al.
- 956 Genome-wide association study of 107 phenotypes in *Arabidopsis thaliana* inbred lines.
- 957 *Nature*. 2010;465: 627–631. doi:10.1038/nature08800
- 958 33. Donoso R, Leiva-Novoa P, Zúñiga A, Timmermann T, Recabarren-Gajardo G,
- 959 González B. Biochemical and Genetic Bases of Indole-3-Acetic Acid (Auxin
- 960 Phytohormone) Degradation by the Plant-Growth-Promoting Rhizobacterium
- 961 *Paraburkholderia phytofirmans* PsJN. Parales RE, editor. *Appl Environ Microbiol*.
- 962 2017;83: e01991-16, e01991-16. doi:10.1128/AEM.01991-16
- 963 34. Ganin H, Kemper N, Meir S, Rogachev I, Ely S, Massalha H, et al. Indole
- 964 Derivatives Maintain the Status Quo Between Beneficial Biofilms and Their Plant Hosts.
- 965 *Mol Plant-Microbe Interactions*®. 2019;32: 1013–1025. doi:10.1094/MPMI-12-18-0327-
- 966 R
- 967 35. Farré-Armengol G, Filella I, Llusia J, Peñuelas J. Bidirectional Interaction
- 968 between Phyllospheric Microbiotas and Plant Volatile Emissions. *Trends Plant Sci*.
- 969 2016;21: 854–860. doi:10.1016/j.tplants.2016.06.005

- 970 36. Fahey JW, Zalcmann AT, Talalay P. The chemical diversity and distribution of  
971 glucosinolates and isothiocyanates among plants. *Phytochemistry*. 2001;56: 5–51.  
972 doi:10.1016/S0031-9422(00)00316-2
- 973 37. Huang AC, Jiang T, Liu Y-X, Bai Y-C, Reed J, Qu B, et al. A specialized  
974 metabolic network selectively modulates *Arabidopsis* root microbiota. *Science*.  
975 2019;364: eaau6389. doi:10.1126/science.aau6389
- 976 38. Castrillo G, Teixeira PJPL, Paredes SH, Law TF, Lorenzo L de, Feltcher ME,  
977 et al. Root microbiota drive direct integration of phosphate stress and immunity. *Nature*.  
978 2017;543: 513–518. doi:10.1038/nature21417
- 979 39. Finkel OM, Castrillo G, Herrera Paredes S, Salas González I, Dangl JL.  
980 Understanding and exploiting plant beneficial microbes. *Curr Opin Plant Biol*. 2017;38:  
981 155–163. doi:10.1016/j.pbi.2017.04.018
- 982 40. Foster KR, Schluter J, Coyte KZ, Rakoff-Nahoum S. The evolution of the host  
983 microbiome as an ecosystem on a leash. *Nature*. 2017;548: 43–51.  
984 doi:10.1038/nature23292
- 985 41. Morgan JL, Darling AE, Eisen JA. Metagenomic sequencing of an in vitro-  
986 simulated microbial community. *PLoS ONE*. 2010;5. doi:10.1371/journal.pone.0010209
- 987 42. Amani J, Kazemi R, Abbasi AR, Salmanian AH. A simple and rapid leaf  
988 genomic DNA extraction method for polymerase chain reaction analysis. *Iran J*  
989 *Biotechnol*. 2011;9: 69–71.
- 990 43. Chelius MK, Triplett EW. The diversity of archaea and bacteria in association  
991 with the roots of *Zea mays* L. *Microb Ecol*. 2001;41: 252–263.  
992 doi:10.1007/s002480000087
- 993 44. White TJ, Bruns S, Lee S, Taylor J. Amplification and direct sequencing of  
994 fungal ribosomal RNA genes for phylogenetics. 1990.
- 995 45. Kozich JJ, Westcott SL, Baxter NT, Highlander SK, Schloss PD. Development  
996 of a dual-index sequencing strategy and curation pipeline for analyzing amplicon  
997 sequence data on the miseq Illumina sequencing platform. *Appl Environ Microbiol*.  
998 2013;79: 5112–5120. doi:10.1128/AEM.01043-13
- 1000 46. Walters WA, Caporaso JG, Lauber CL, Berg-Lyons D, Fierer N, Knight R.  
1001 PrimerProspector: De novo design and taxonomic analysis of barcoded polymerase  
1002 chain reaction primers. *Bioinformatics*. 2011;27: 1159–1161.  
1003 doi:10.1093/bioinformatics/btr087
- 1004 47. Samarakoon T, Wang SY, Alford MH. Enhancing PCR Amplification of DNA  
1005 from Recalcitrant Plant Specimens Using a Trehalose-Based Additive. *Appl Plant Sci*.  
1006 2013;1: 1200236. doi:10.3732/apps.1200236
- 1007 48. Rohland N, Reich D. Cost-effective, high-throughput DNA sequencing  
1008 libraries for multiplexed target capture. *Genome Res*. 2012;22: 939–946.  
1009 doi:10.1101/gr.128124.111
- 1010 49. Caporaso JG, Lauber CL, Walters W a, Berg-Lyons D, Huntley J, Fierer N, et  
1011 al. Ultra-high-throughput microbial community analysis on the Illumina HiSeq and  
1012 MiSeq platforms. *ISME J*. 2012;6: 1621–1624. doi:10.1038/ismej.2012.8
- 1013 50. Martin M. Cutadapt removes adapter sequences from high-throughput  
1014 sequencing reads. *EMBnet.journal*. 2011;17: 10. doi:10.14806/ej.17.1.200
- 1015 51. Kõljalg U, Nilsson RH, Abarenkov K, Tedersoo L, Taylor AFS, Bahram M, et  
1016 al. Towards a unified paradigm for sequence-based identification of fungi. *Mol Ecol*.  
1017 2013;22: 5271–5277. doi:10.1111/mec.12481
- 1018 52. Quast C, Pruesse E, Yilmaz P, Gerken J, Schweer T, Yarza P, et al. The  
1019 SILVA ribosomal RNA gene database project: improved data processing and web-  
1020 based tools. *Nucleic Acids Res*. 2013;41: D590–D596. doi:10.1093/nar/gks1219
- 1021 53. Dixon P. VEGAN, a package of R functions for community ecology. *J Veg Sci*.  
1022 2003;14: 927–930. doi:10.1111/j.1654-1103.2003.tb02228.x
- 1023 54. Anderson MJ, Willis TJ. Canonical analysis of principal coordinates: a useful  
1024 method of constrained ordination for ecology. *Ecology*. 2003;84: 511–525.  
doi:10.1890/0012-9658(2003)084[0511:CAOPCA]2.0.CO;2



- 1025 55. Bates D, Maechler M, Bolker B, Walker S. Fitting linear mixed-effects models  
1026 using lme4. *J Stat Softw.* 2015. doi:10.18637/jss.v067.i01
- 1027 56. Aitchison J. The Statistical analysis of compositional data. *J R Stat Soc Ser B.*  
1028 1982;44: 365–374. doi:10.2307/2345821
- 1029 57. Lê Cao K-AK-A, González I, Déjean S, González I. Unravelling “omics” data  
1030 with the R package mixOmics. *HAL.* 2012.
- 1031 58. Zhao T, Liu H, Roeder K, Lafferty J, Wasserman L. The huge Package for  
1032 High-dimensional Undirected Graph Estimation in R. *J Mach Learn Res JMLR.*  
1033 2012;13: 1059–1062.
- 1034 59. Csárdi G, Nepusz T. The igraph software package for complex network  
1035 research. *InterJournal Complex Syst.* 2006;1695: 1–9.
- 1036 60. Pau G, Fuchs F, Sklyar O, Boutros M, Huber W. EBImage—an R package for  
1037 image processing with applications to cellular phenotypes. *Bioinformatics.* 2010;26:  
1038 979–981. doi:10.1093/bioinformatics/btq046
- 1039 61. McCaig AE, Grayston SJ, Prosser JI, Glover LA. Impact of cultivation on  
1040 characterisation of species composition of soil bacterial communities. *FEMS Microbiol*  
1041 *Ecol.* 2001;35: 37–48. doi:10.1111/j.1574-6941.2001.tb00786.x
- 1042 62. Wang K, Sipilä TP, Overmyer K. The isolation and characterization of resident  
1043 yeasts from the phylloplane of *Arabidopsis thaliana*. *Sci Rep.* 2016;6: 39403.  
1044 doi:10.1038/srep39403
- 1045 63. Collado J, Platas G, Paulus B, Bills GF. High-throughput culturing of fungi  
1046 from plant litter by a dilution-to-extinction technique. *FEMS Microbiol Ecol.* 2007;60:  
1047 521–533. doi:10.1111/j.1574-6941.2007.00294.x
- 1048 64. Bartoli C, Frachon L, Barret M, Rigal M, Huard-Chauveau C, Mayjonade B, et  
1049 al. In situ relationships between microbiota and potential pathobiota in *Arabidopsis*  
1050 *thaliana*. *ISME J.* 2018;12: 2024–2038. doi:10.1038/s41396-018-0152-7
- 1051 65. Karasov TL, Almario J, Friedemann C, Ding W, Giolai M, Heavens D, et al.  
1052 *Arabidopsis thaliana* and *Pseudomonas* pathogens exhibit stable associations over  
1053 evolutionary timescales. *Cell Host Microbe.* 2018;24: 168–179.e4.  
1054 doi:10.1016/J.CHOM.2018.06.011
- 1055 66. Bradski G. The OpenCV Library. *Dr Dobbs J Softw Tools.* 2000.
- 1056 67. Alonso-Blanco C, Andrade J, Becker C, Bemm F, Bergelson J, Borgwardt  
1057 KM, et al. 1,135 genomes reveal the global pattern of polymorphism in *Arabidopsis*  
1058 *thaliana*. *Cell.* 2016;166: 481–491. doi:10.1016/j.cell.2016.05.063
- 1059 68. Li H, Durbin R. Fast and accurate short read alignment with Burrows-Wheeler  
1060 transform. *Bioinformatics.* 2009;25: 1754–1760. doi:10.1093/bioinformatics/btp324
- 1061 69. Li H. Aligning sequence reads, clone sequences and assembly contigs with  
1062 BWA-MEM. *ArXiv Prepr ArXiv.* 2013;00: 3. doi:arXiv:1303.3997 [q-bio.GN]
- 1063 70. Li H, Handsaker B, Wysoker A, Fennell T, Ruan J, Homer N, et al. The  
1064 Sequence Alignment/Map format and SAMtools. *Bioinformatics.* 2009;25: 2078–2079.  
1065 doi:10.1093/bioinformatics/btp352
- 1066 71. Tarasov A, Vilella AJ, Cuppen E, Nijman IJ, Prins P. Sambamba: Fast  
1067 processing of NGS alignment formats. *Bioinformatics.* 2015;31: 2032–2034.  
1068 doi:10.1093/bioinformatics/btv098
- 1069 72. Van der Auwera GA, Carneiro MO, Hartl C, Poplin R, del Angel G, Levy-  
1070 Moonshine A, et al. From fastq data to high-confidence variant calls: the genome  
1071 analysis toolkit best practices pipeline. *Curr Protoc Bioinforma.* 2013.  
1072 doi:10.1002/0471250953.bi1110s43
- 1073 73. DePristo MA, Banks E, Poplin R, Garimella KV, Maguire JR, Hartl C, et al. A  
1074 framework for variation discovery and genotyping using next-generation DNA  
1075 sequencing data. *Nat Genet.* 2011;43: 491–498. doi:10.1038/ng.806
- 1076 74. Zhao K, Aranzana MJ, Kim S, Lister C, Shindo C, Tang C, et al. An  
1077 *Arabidopsis* example of association mapping in structured samples. *PLoS Genet.*  
1078 2007;3: e4. doi:10.1371/journal.pgen.0030004
- 1079 75. Horton MW, Hancock AM, Huang YS, Toomajian C, Atwell S, Auton A, et al.

- 1080 Genome-wide patterns of genetic variation in worldwide *Arabidopsis thaliana*  
1081 accessions from the RegMap panel. Nat Genet. 2012;44: 212–216.  
1082 doi:10.1038/ng.1042  
1083 76. Purcell S, Neale B, Todd-Brown K, Thomas L, a.R. Ferreira M, Bender D, et  
1084 al. PLINK: A tool set for whole-genome association and population-based linkage  
1085 analyses. Am J Hum Genet. 2007;81: 559–575. doi:10.1086/519795  
1086 77. Chang CC, Chow CC, Tellier LCAM, Vattikuti S, Purcell SM, Lee JJ. Second-  
1087 generation PLINK: rising to the challenge of larger and richer datasets. GigaScience.  
1088 2015;4: 7. doi:10.1186/s13742-015-0047-8  
1089 78. Zhou X, Stephens M. Genome-wide efficient mixed-model analysis for  
1090 association studies. Nat Genet. 2012;44: 821–4. doi:10.1038/ng.2310  
1091 79. Yang J, Manolio TA, Pasquale LR, Boerwinkle E, Caporaso N, Cunningham  
1092 JM, et al. Genome partitioning of genetic variation for complex traits using common  
1093 SNPs. Nat Publ Group. 2011;43: 519–525. doi:10.1038/ng.823  
1094  
1095

1096 **Acknowledgements:** Many thanks to Mia Holm for her hospitality and wonderful dinners  
1097 after hard work in the field as well as help during harvesting; to Einar Holm for helping with  
1098 field work and taking photos of harvested plants; to Torbjörn Säll for assistance with  
1099 sampling and providing greenhouse space in Lund; and finally to the Kleen family, the  
1100 Öhman family, Nils Jönsson and the Rathkegårdén farm for allowing us to install our  
1101 experiments on their land. Thanks to Timothée Flutre and Talia Karasov for helpful  
1102 discussions on previous versions of the manuscript. Thanks to Man Yu from the Dean lab  
1103 who helped generate stem images used for seed production estimates and manual seed  
1104 production estimates. This work was funded by a grant from the National Health Institute  
1105 (R01 GM 083068) to JB, MN and CD, by a Dropkin Foundation Fellowship to BB and with  
1106 support from the University of Chicago to JB. BB has received the support of the EU in the  
1107 framework of the Marie-Curie FP7 COFUND People Programme, through the award of an  
1108 AgreeSkills/AgreeSkills+ fellowship (under grant agreement n° 267196). Computing  
1109 resources and storage were provided by: the Center for Research Informatics, funded by the  
1110 Biological Sciences Division at the University of Chicago with additional funding provided  
1111 by the Institute for Translational Medicine, CTSA grant number UL1 TR000430 from the  
1112 National Institutes of Health; the genotoul bioinformatics platform Toulouse Occitanie,  
1113 France (Bioinfo Genotoul, <https://doi.org/10.15454/1.5572369328961167E12>); and Bordeaux  
1114 Bioinformatics Center (CBiB) at the University of Bordeaux, France.  
1115

1116 **Author Contributions:** BB, DF, SH, JB, MN and CD designed the field trials. BB, DF and  
1117 SH coordinated fieldwork. BB, DF, EK, FR, AA, MB, SD, TCM, PN, TT, RW took part in  
1118 fieldwork. HW, with assistance from FH and RF isolated B38, produced the genome  
1119 sequence and assessed its growth promoting effect in controlled conditions. FR computed the  
1120 SNP data used for association analysis. BB, PD, MLM, RW produced the microbiota  
1121 sequence data. PLG, TCM and BB generated and analyzed the metabolomics data. BB and  
1122 JB conceived of analyses, and BB analyzed the data. BB and JB wrote the paper. MP helped  
1123 develop the methods for microbiota sequencing. DF, TCM, MP, CD, MN provided comments  
1124 on the manuscript.  
1125

1126 **Competing interests:** The authors declare no competing interests.  
1127

1128

1129 **Repeatability of analysis and data availability**

1130 All scripts used to performed the analyses presented in this paper, as well as non-

1131 essential but complementary figures, are available in the repository

1132 [https://forgemia.inra.fr/bbrachi/microbiota\\_paper.git](https://forgemia.inra.fr/bbrachi/microbiota_paper.git)

1133 The ITS and 16S amplicons and B38 sequence data is available under bioproject

1134 [PRJNA707473](https://ncbi.nlm.nih.gov/bioproject/PRJNA707473)

1135

1136 **Supplementary Information** is linked to the online version of the paper at

1137 [www.nature.com/nature](http://www.nature.com/nature).

1138

1139 **Materials & Correspondence**

1140

1141 Reprints and permissions information is available at [www.nature.com/reprints](http://www.nature.com/reprints)

1142 The authors declare no competing financial interests.

1143 Correspondence and requests for materials should be addressed to [jbergels@uchicago.edu](mailto:jbergels@uchicago.edu)

1144

1145

1146 **Figures:**

1147

1148 **Fig. 1 | Plants grown in different environments have different microbial communities.**

1149 The plots represent the projection of each sample on the plane defined by the first two  
1150 constrained components of the fungal and bacterial communities, describing variation among  
1151 sites and years. The percentages in parentheses are the proportion of the total inertia (square  
1152 root of the Bray-Curtis dissimilarity) explained by each component. The colors of the points  
1153 indicate the site from which samples were collected. Experiments from the South are  
1154 represented in red (SU) and yellow (SR), and experiments from the North in blue (NR) and  
1155 dark blue (NA). All points from 2012 and 2013 are encircled by a dark and lighter grey line  
1156 respectively.

1157 **Fig. 2 | The effect of host genetic variation on the microbial community targets**

1158 **relatively few OTUs and percolates through hubs.** This figure corresponds to observations  
1159 in the set of four experiments sampled in 2013, see Extended Data Figure 3 for experiments  
1160 performed in 2012. **A-D:** Each frame presents the distribution of heritability estimates for  
1161 individual OTUs in one site. In each frame, the inset graph is a box and whiskers plot  
1162 contrasting the heritability (y-axis) of bacterial (B) and fungal (F) OTUs. **E-F:** The heritable  
1163 hubs are represented by large dots, at a distance of 0 (hub). The other OTUs are represented  
1164 by smaller dots and the x-axis represents their distance to the nearest heritable hub(s) within  
1165 the sparse covariance networks. The number of heritable hubs detected in each experiment is  
1166 indicated in the legend. The correlation coefficients presented are Kendall rank correlations  
1167 calculated for OTUs with a distance to the heritable hub(s) above 0. NE stands for “no edge”.  
1168

1169 **Fig. 3 | Relationship between host genotype seed production and influence on microbial**

1170 **hubs across sites and years.** **A.** Proportion of heritable hub relative counts explained by host  
1171 effects across all sites and years. **B.** Coefficients for the linear regression explaining lifetime  
1172 seed production variation among accession with accession effects on microbial hubs across  
1173 experiments (after model selection).  
1174

1175 **Extended Data:**

1176 **Extended Data Fig. 1 | Relative frequency of the 10 most frequent OTUs.** Each stacked  
1177 bar (x-axis) corresponds to a site/year combination. The y-axis gives the proportion of the 10  
1178 most frequent OTUs. The colors correspond to the taxonomic assignments of OTUs given in  
1179 the legend (class / order / family).  
1180

1181 **Extended Data Fig. 2 | The effect of host genetic variation on the microbial community**

1182 **targets relatively few OTUs and percolates through hubs.** This figure corresponds to  
1183 observations in the set of 4 experiments performed in 2012. The same figure is available for  
1184 the 2013 experiments in Figure 1. **A-D:** Each frame presents the distribution of heritability  
1185 estimates for individual OTUs in one site. In each frame, the inset graph is a box and  
1186 whiskers plot contrasting the heritability (y-axis) of bacterial (B) and fungal (F) OTUs. **E-F:**  
1187 The heritable hubs are represented by large dots, at a distance of 0 (hub). The other OTUs are  
1188 represented by smaller dots and the x-axis represents their distance to the nearest heritable  
1189 hub(s) within the sparse covariance networks. The number of heritable hubs detected in each

1190 experiment is indicated in the legend. The correlation coefficients presented are Kendall rank  
1191 correlations calculated for OTUs with a distance to the heritable hub(s) above 0.

1192

1193 **Extended Data Fig. 3** | Relationship between the mean per site / year combination of the  
1194 normalized rank abundance of OTUs (x-axis, rank divided by the number of OTUs) in each  
1195 sample, and heritability (y-axis). Colored points are heritable OTUs and the color and shape  
1196 indicate the site and year, respectively. Normalized rank abundance of OTUs displays a  
1197 positive weak but significant relationship with heritability which has an adjusted  $r$ -squared of  
1198 0.04674 (Fstat=205.8, df=4176, p-value: < 2.2e-16).

1199

1200 **Extended Data Fig. 4 | Hubs in microbial networks.** Each frame presents the relationship  
1201 between degree and betweenness centrality for vertices in the networks computed for each  
1202 site (SU, SR, NM and NA) and year (2012, 2013). Each dot represents an OTU (fungal or  
1203 bacterial). The larger and labeled dots correspond to OTUs that have values of betweenness  
1204 centrality and degree in the 5% tail of both statistics.

1205

1206 **Extended data Fig. 5 | Relationship between prevalence, heritability (A) , betweenness**  
1207 **(B) and degree (C).** We performed 8 independent experiments, over two years. For each  
1208 experiment, we defined prevalent OTUs as those detected in over 50% of the plants. In the  
1209 three panels, the x-axis represents the number of experiments (from 1 to 8) in which an OTU  
1210 was prevalent, with years distinguished by shape and sites distinguished by color. In A, the y-  
1211 axis indicates heritability of OTU relative abundance (i.e. variance explained by a random  
1212 accession effect) estimated within experiments. Colored points represent OTUs with  
1213 significant heritability. In B and C, the y-axis indicates betweenness and degree of OTU in  
1214 networks computed for each experiment and colors points are OTUs defined as hubs.

1215

1216 **Extended Data Fig. 6 | Correlation between lifetime seed production (LSP) estimates**  
1217 **obtained by counting and measuring siliques (x-axis) versus automated LSP estimates.**  
1218 A. Row data and Spearman rho rank correlation coefficient. B. Log transformed data and  
1219 Pearson's correlation coefficient. In both panels, outliers are indicated in red.

1220

1221

1222 **Extended Data Fig. 7 | Positive correlations among genotype lifetime seed production**  
1223 **(LSP) estimates in different experiments.** We measure LSP, a major component of fitness  
1224 in this autogamous selfing species, in four sites over two years for 200 Swedish accessions.  
1225 This figure shows the pairwise correlations between accession effects on this fitness  
1226 component estimated in the eight experiments.

1227

1228 **Extended Data Fig. 8 | Abundant plant specialized metabolites contribute to shaping the**  
1229 **relative abundance of microbial hubs. A. Relationships between specialized metabolites**  
1230 **and microbial hubs across experiments.** Each bar corresponds to an F-statistic for the  
1231 effects of the site (grey), the molecule (blue) and the interaction between the two (orange) in  
1232 a model following the formula  $HUB \sim Molecule + Site + Molecule * Site$  (in the form  $HUB \sim$   
1233  $Molecule$  along the x-axis). The stars associated with each bar indicate the level of  
1234 significance of the Molecule effect (after FDR correction for 623 tests, only models with  $p$ -  
1235 value <0.01 for the molecule effects are shown). Site effects were large for all hubs but the  
1236 interactions between site and molecule were always small and generally not significant (33  
1237 significant in 623 tests without FDR correction; only one significant with FDR correction). **B.**  
1238 **Heritability estimates of the molecules** in the field (grey bars) and in the greenhouse (blue  
1239 bars), and in sterile conditions (orange bars) for each molecule. The vertical segments are

1240 95% confidence intervals obtained with 500 bootstraps for heritability estimates. **C. Genetic**  
1241 **correlations for specialized metabolites between accessions grown in the field and in the**  
1242 **greenhouse.** Each bar represents a Pearson's correlation coefficient between field and  
1243 greenhouse estimates of accession effects (blups) and significance is given by the stars (after  
1244 FDR correction for 17 tests). Missing bars correspond to molecules with no heritability in the  
1245 greenhouse and/or the field. B and C share the x-axis labels.

1246  
1247

1248 **Extended Data Table 1 | Host variation has a subtle impact on overall community**  
1249 **variation.** The first 3 columns indicate the community, site and year for which the analyses  
1250 were performed. Nh stands for the number of principal coordinate components with  
1251 significant broad sense heritability estimates (95% confidence intervals not overlapping 0). A  
1252 total of 10 components were computed for each community/site/year combination. “VE”  
1253 indicates the total amount of microbial community variation captured by the first 10  
1254 components and “he” provides an estimated proportion of total variation explained by the  
1255 identity of host accessions (over the *i* heritable components for each site/year combination).  
1256 The overall host effects reported in the main text reflect the distribution of VE\*he in this  
1257 table.

1258

1259 **Extended Data Table 2 | List of heritable hubs.** Hub OTUs detected in each site and year.  
1260 H2 is the point heritability estimate for each hub. The columns order, family and genus  
1261 provide taxonomic assignments.

1262

1263 **Extended Data Table 3 | Hubs are enriched for interkingdom connections (edges).** For  
1264 each site (first column) and year (second column), the table presents the results from a  $\chi^2$   
1265 testing for enrichment in interkingdom edges (third column) when considering all edges, or  
1266 edges involving at least one hub. B\_B, B\_F, F\_F give the number of edges between 2  
1267 bacterial OTUs, a bacterial and a fungal OTU, and 2 fungal OTUs, respectively. The  
1268 following columns are chi-square values, *p*-values and FDR adjusted *p*-values for 8 tests.

1269

1270 **Extended Data Table 4 | Relationships between host genotype lifetime seed production**  
1271 **and influence over microbial hubs.** For each experiment, we computed a multiple linear  
1272 regression aimed at explaining variation in lifetime seed production among accessions as a  
1273 function of variation in the effects of accessions on heritable microbial hubs (as well as their  
1274 squared values indicated by “<sup>2</sup>”, for example F8 and F8<sup>2</sup>). The table summarizes the results  
1275 for each site and year, giving the number of accessions used and the adjusted *r*<sup>2</sup> for each  
1276 model after forward/backward model selection. The column “selected terms” indicate the  
1277 microbial hubs included in the final model, the sign of the effect (-, +) with the significance  
1278 in the last column (ns: *p*-value  $\geq 0.1$ , . :  $0.1 \geq p\text{-value} > 0.05$ , \*:  $0.05 \geq p\text{-value}$   
1279  $> 0.01$ , \*\*:  $0.01 \geq p\text{-value} > 0.001$ , \*\*\* :  $p\text{-value} \leq 0.001$ ).

1280

1281 **Extended Data Table 5 | Geographical coordinates of Swedish collection sites for live**  
1282 **microbial isolates.**

1283

1284 **Extended Data Table 6 | Secondary metabolites detected in this study.** “ID” refers to the  
1285 identifier assigned to each molecule. “Name” indicates the putative names for the molecules  
1286 if identified. “Category” describes the type of metabolite: C stands for cyanidin, F stands for  
1287 flavonoid; GSL stands for glucosinolate; O stands for other. “Base structure” describes the  
1288 flavonol core of the flavonoids: C stands for Cyanidin, K for Kaempferol and Q for  
1289 Quercetin. The next eight columns indicate the numbers of different saccharides or the

1290 chemical groups that enter in the structure of molecules. “RT” stands for retention time (in  
1291 second). “mass” indicates the molecular weight: “(obs)” stands for observed and “(exp)” for  
1292 expected according to the formula.  
1293

#### 1294 **Supplementary information:**

1295 **Supplementary Table 1** | Natural accessions of *Arabidopsis thaliana* originating from  
1296 Sweden and grown in 4 sites across Sweden.  
1297

1298 **Supplementary Table 2 | Bacterial and Fungal OTUs detected.** The table provides, for the  
1299 581 Bacterial OTUs and 704 fungal OTUs, the taxonomic assignments. In addition, column  
1300 “heritable”, “hubs”, “heritable hub” indicate the number of experiment (0 to 8) in which  
1301 OTUs were significantly influenced by host genotype, a hub in the community and both,  
1302 respectively. Column “Nexp” indicates the number of experiments in which each OTU was  
1303 prevalent. “Core microbiota” indicates if the OTU was part of the core microbiota defined in  
1304 this study (1: yes, 0: no).  
1305

1306 **Supplementary Table 3 | QTLs associated with host effects on hubs and our fitness  
1307 estimate across experiments.** The columns “chromosome”, “start”, and “stop” indicate the  
1308 genomic coordinates for each QTL. The columns “Nqtl” indicates the number of overlapping  
1309 associated loci identified by the local score approach which were merged into the QTL. The  
1310 column “repres” provides a representative SNP for each associated loci aforementioned.  
1311 Representative SNPs are chosen to have the largest absolute effect on the phenotype for each  
1312 associated loci. The following column describes which traits display associations with each  
1313 QTL. For example on line 2, the QTL region overlaps with a loci associated with B41 (value  
1314 =1) and is an exact match for the loci associated with B99 (value =2). The column “Ntraits”  
1315 simply counts the number of traits with associations in a QTL region and the column “sizes”  
1316 is simply the difference between “start” and “stop” and measures QTLs sizes in base pairs.  
1317

1318 **Supplementary Table 4 | Biological processes** significantly enriched among genes  
1319 overlapping with QTLs for microbial hub variation. “trait” simply indicates the trait for  
1320 which we detected significant enrichment. The columns “name”, “description” and  
1321 “databases” refer to GO terms identification, and “pathway” is the pathway description. “size”  
1322 refers to the number of genes annotated with the corresponding terms, “setRank” is the  
1323 setRank statistic characterizing the importance of a gene set, i.e. how much it overlaps with  
1324 other gene sets, “pSetRank” expresses the probability of observing a gene set with the same  
1325 setRank value in a random network with the same number of nodes and edges as the observed  
1326 gene set network. “correctedPValue” is the enrichment *p*-value accounting for overlapping  
1327 gene sets and “adjustedPValue” is the same probability but adjusted for multiple testing.  
1328 “enr” and “pv” are the enrichment and associated *p*-value for the method accounting for  
1329 linkage disequilibrium and non-random distribution of terms along the genome.  
1330

1331 **Supplementary Table 5 | Pathways** significantly enriched among genes overlapping with  
1332 QTLs for microbial hub variation. (See description Supplementary Table 4).  
1333  
1334  
1335  
1336  
1337
